1 Title:

2 The response of desert biocrust bacterial communities to hydration-desiccation cycles

3

4 Authors:

5 Capucine Baubin<sup>§</sup>, Noya Ran, Hagar Siebner, Osnat Gillor<sup>§</sup>

6

7 Affiliation:

8 Zuckerberg Institute for Water Research, Blaustein Institutes for Desert Research, Ben-

9 Gurion University of the Negev, 8499000, Israel

10

11 Corresponding authors:

12 <sup>§</sup>Capucine Baubin, Zuckerberg Institute for Water Research, Blaustein Institutes for Desert

13 Research, Ben-Gurion University of the Negev, 8499000, Israel. Tel: 972-8-6596363; e-mail:

14 [baubin@bgu.ac.il](mailto:baubin@bgu.ac.il)

15 <sup>§</sup>Osnat Gillor, Zuckerberg Institute for Water Research, Blaustein Institutes for Desert

16 Research, Ben-Gurion University of the Negev, 8499000, Israel. Tel: 972-8-6596986; e-mail:

17 [gilloro@bgu.ac.il](mailto:gilloro@bgu.ac.il)

18

19 ABSTRACT

20 Rain events in arid environments are highly unpredictable, interspersing extended periods of  
21 drought. Therefore, following changes in desert soil bacterial communities during hydration-  
22 desiccation cycles in the field, was seldom attempted. Here, we assessed rain-mediated  
23 dynamics of active community in the Negev Desert biological soil crust (biocrust), and  
24 evaluated the changes in bacterial composition, potential function, and photosynthetic  
25 activity. We predicted that increased biocrust moisture would resuscitate the phototrophs,  
26 while desiccation would inhibit their activity. Our results show that hydration increased  
27 chlorophyll content, resuscitated the biocrust *Cyanobacteria*, and induced potential  
28 phototrophic functions. However, decrease in the soil water content did not immediately  
29 decrease the phototrophs activity, though chlorophyll levels decreased. Moreover, while the  
30 *Cyanobacteria* relative abundance significantly increased, *Actinobacteria*, the former  
31 dominant taxa, significantly decreased in abundance. We propose that, following a rain event  
32 biocrust moisture significantly decreased, almost to drought levels, yet the response of the  
33 active bacterial community lagged, in contrast to topsoil. Possible explanations to the  
34 described rain-mediated bacteria dynamics are discussed.

35

36 Key words: hydration; biocrust; bacteria; *Cyanobacteria*; *Actinobacteria*;

## 37 1. INTRODUCTION

38 Arid environments are the largest terrestrial biomes on Earth and accounts for 35% of the  
39 landmass (Pointing and Belnap, 2012). Since rain in arid environments is rare and  
40 unpredictable, the main source of water is dew (Malek et al., 1999) and fog (Kidron et al.,  
41 2002). This moisture is readily absorbed to the soil surface, but would quickly evaporates due  
42 to high temperatures and low humidity (Cameron and Blank, 1966). The long droughts in  
43 drylands limit plant growth and in their stead, the soil is covered by microbial mats, called  
44 biological soil crust (biocrust). Biocrusts are a matrix of phototroph and heterotroph  
45 microorganisms that bind together with soil particles, by using extracellular polymeric  
46 substances (EPS) (Belnap and Lange, 2001; Campbell et al., 1989; Kidron et al., 2020).  
47 Biocrust phototrophs are the main primary producers in this desolate habitat and together with  
48 the heterotrophs form a rigid and stable mat that is able to resist to xerification and soil  
49 erosion (Aanderud et al., 2019; Bowker et al., 2018).

50

51 Biocrusts are the main source of carbon and nitrogen (Agarwal et al., 2014), and a strong  
52 contributor of soil respiration (Castillo-Monroy et al., 2011) in deserts. It was recently shown  
53 that, during long droughts many of the biocrust microorganisms rely not only on  
54 photosynthesis but also on oxidation of atmospheric trace gases (Leung et al., 2020; Meier et  
55 al., 2021). Yet, once the biocrust is hydrated, the phototrophs respond quickly by inducing  
56 their photosynthetic systems and related functions to take full advantage of the rare water  
57 abundance before the soil dehydrates (Murik et al., 2017). To that end, photosynthetic  
58 members of the biocrust community form a seed bank of species that are able to spring to life  
59 whenever the water content increases (Kedem et al., 2020; Lennon and Jones, 2011; Murik et  
60 al., 2017). Yet, the abrupt hydration may also cause osmotic shock that could result in  
61 massive cell lysis and the release of osmoregulatory solutes (Halverson et al., 2000; Harris,

62 1981). The period of water abundance is usually brief, and the soil quickly dehydrates forcing  
63 the bacteria to cease their activity (Murik et al., 2017; Oren et al., 2019). Therefore, the  
64 members of the biocrust community must respond quickly and efficiently not only to  
65 hydration but also to the subsequent desiccation.

66

67 Earlier studies focused on community structure and cyanobacterial response to hydration-  
68 desiccation cycles under controlled conditions (Angel and Conrad, 2013; Meier et al., 2020;  
69 Oren et al., 2019; Wu et al., 2013). To the best of our knowledge, these cycles were never  
70 monitored in the field during a rain event. Under natural conditions, the biocrust community  
71 dynamics of the hydration-desiccation cycle may be affected by plethora of variables, such as  
72 temperature, rain intensity, or soil local structure, which could not be applied in a laboratory  
73 setting. Thus, it is imperative to elucidate the resuscitated community and its response to the  
74 gradual dehydration after a rain event in the field.

75

76 In this study, we followed the community structure and activity before, during, and after a  
77 rain event in the arid Negev Desert (Israel). We studied the active biocrust community by  
78 using SSU ribosomes as a proxy to active bacterial community (Št'ovíček et al., 2017).  
79 Although ribosomes do not quickly degrade in dormant or even dead cells (Sukeník et al.,  
80 2012; Sunyer-Figueroles et al., 2018), under field conditions they present a reliable mean to  
81 distinguish between active and inactive cells (Angel et al., 2013; Št'ovíček et al., 2017). We  
82 hypothesised that the biocrust community would quickly respond to hydration and to  
83 desiccation. We predicted that high soil moisture would trigger photosynthetic activity and a  
84 decreasing soil moisture will lead to an inactivation of the phototrophs within the biocrust  
85 community. We further predicted that heterotrophs response to hydration-desiccation would  
86 differ among phyla as previously reported for biocrust (Angel and Conrad, 2013) and topsoil

87 (Št'ovíček et al., 2017) collected from the same site. The most apparent change detected in  
88 both soil horizons was the sharp decrease in the relative abundance of *Actinobacteria* that  
89 dominant the soil during droughts but decline upon hydration.

90

## 91 2. MATERIAL AND METHODS

### 92 2.1. Sampling

93 The study was conducted in the long-term ecological research station in the Negev Desert  
94 Highlands (Zin Plateau, 30°86'N, 34°80'E, Israel; Figure 1). In this arid environment, the  
95 average annual rainfall is around 90 mm and extends from October to April. Biocrust samples  
96 were collected on 20/06/17 during the dry season (T[0]; average temperature: 32.4°C) and  
97 during a rain event in the wet season from 29/01/18 through 01/02/18 at 24 hr intervals. The  
98 rain event (5.1 mm, maximum average temperature 14.6 °C) occurred 29/01/18 (T[R]) and  
99 samples were collected till the biocrust dried (T[1], T[2], T[3]; Figure 1) For each time point,  
100 five samples at least 10 m apart were collected (N = 25 samples). The biocrust samples were  
101 homogenised using a 2 mm sieve and then four subsamples were stored: (1) at -80°C for  
102 molecular analysis; (2) at -20°C for chlorophyll extraction; (3) at 60°C for 3 days and then  
103 kept at room temperature for chemical analysis; and (4) was used immediately to evaluate the  
104 water content.

105

### 106 2.2. Physico-chemical analyses

107 Water content, organic carbon and total nitrogen were measured in the soil samples. Biocrust  
108 water content was determined by the gravimetric method, the soil was weighed before and  
109 after oven drying at 105 °C, then the percentage of moisture in the soil was determined  
110 (Scrimgeour, 2008). Organic carbon content was determined using the loss-on-ignition  
111 method. 30 g of the dry soil sample was weighed burnt at 380°C for 6 hours, and the fraction  
112 of organic carbon content was calculated as previously described (Hoogsteen et al., 2015;  
113 Scrimgeour, 2008). Total nitrogen was measured in 50 mg of soil using the FlashSmart  
114 CHNS/O elemental analyser (ThermoFischer, Waltham, MA, USA). The standards: BBOT

115 (2,5-Bis (5-tert-butyl-benzoxazol-2-yl) thiophene), Tocopherol Nicotinate and a soil reference  
116 material were used to calibrate the instrument.

117

### 118 2.3. Chlorophyll concentration and water content

119 The chlorophyll of each sample was extracted using a protocol based on Castle et al., (2010)  
120 and Ritchie, (2006). The extraction was done using methanol, with a soil:methanol ratio of  
121 3:9, followed by a 15-minutes incubation at 65°C and a 2-hour incubation at 4°C. The  
122 samples were measured by spectrophotometry at 665 nm and the concentration of chlorophyll  
123 was calculated following Ritchie, (2006). Positive controls were spirulina with a  
124 concentration of 0.003g/g of soil and negative controls were distilled water. The  
125 concentrations are presented in mg of chlorophyll per gram of soil (mg chla/g soil).

126

### 127 2.4. RNA extraction and preparation for sequencing

128 RNA was extracted from 0.5 – 1 g of soil using phenol-chloroform, following the protocol  
129 from Angel (2012). The extracted total nucleic acid was treated with DNase to remove the  
130 DNA. The remaining RNA was cleaned using parts of the *MagListo* RNA Extraction kit  
131 (Bioneer, Daejeon, South Korea). The RNA was reverse transcribed to cDNA using  
132 Superscript IV (ThermoFischer, Waltham, MA, USA), and purified using the PCR  
133 purification kit (Bioneer, Daejeon, South Korea) in accordance with the manufacturers'  
134 instructions. The cDNA was used as a template to amplify the V3F(341) and V4R(806)  
135 regions of the 16S rRNA with CS1/CS2 extensions (Table A.1), in triplicates. Library  
136 preparations and sequencing were performed at the Research Resource Centre at the  
137 University of Illinois with pair end (2 x 300 bp) MiSeq platform (Illumina, San Diego, CA,  
138 USA). Due to low concentrations of ribosomes in the dry soil collected during the summer of  
139 2017, we had to re-extract and re-sequence these samples. However, COVID-19 restrictions

140 prohibit us from using the same sequencing platform, and we were forced to use the facilities  
141 and resources available to us at the time. Therefore, RNA was extracted using the RNeasy  
142 PowerSoil Total RNA Kit (Qiagen, Hilden, Germany), following the manufacturer's protocol.  
143 Then, the V3-V4 region of the 16S rRNA was amplified in triplicates using the CS1-  
144 V3F(341) and CS2-V4R(515) primers (Table A.1). The samples were sequenced (2 x 150 bp)  
145 on the iSeq platform (Illumina, San Diego, CA, USA) at the Central and Northern Arava  
146 R&D Center (Israel).

147

## 148 2.5. Community analysis

149 Reads were merged, quality checked, and trimmed following the NeatSeq-Flow pipeline  
150 (Sklarz et al., 2018). The sequences were analysed using QIIME2 (Bolyen et al., 2018) and  
151 Dada2 (Callahan et al., 2016). Reads were clustered in amplicon sequence variants (ASVs)  
152 and taxonomy was assigned using Silva v138 (Quast et al., 2013). The total number of  
153 sequences can be found in Table A.2. All raw sequences used in this study can be found in  
154 BioProject (<https://www.ncbi.nlm.nih.gov/bioproject>) under the submission number  
155 PRJNA718159.

156

## 157 2.6. Functional predictions

158 Functional predictions of the 16S amplicons was done using Piphillin (Iwai et al., 2016;  
159 Narayan et al., 2020) and the KEGG database with a 97%-identity cut-off (May 2020)  
160 (Kaneshisa and Goto, 2000). Steps of metabolic pathways for different methods of harvesting  
161 energy (organotrophy, lithotrophy and phototrophy) (Cordero et al., 2019; Greening et al.,  
162 2016; León-Sobrino et al., 2019; Tveit et al., 2019), for parts of the nitrogen cycle (Madigan  
163 et al., 2009), and for the survival of the individual during a drought (DNA conservation and  
164 repair, sporulation and Reactive Oxygen Species (ROS)-damage prevention) (Borisov et al.,



165 2013; Hansen et al., 2007; Henrikus et al., 2018; Preiss, 1984; Preiss and Sivak, 1999; Rajeev  
166 et al., 2013; Repar et al., 2012; Slade and Radman, 2011) were selected. Then, we picked out  
167 genes of interest from each step in the KEGG database and built our own database (Table  
168 A.3). The assignment of function to the KEGG numbers of the abundance table from Piphillin  
169 was done in R using phyloseq (McMurdie et al., 2017). The significance of temporal  
170 differences in predicted functionalities was evaluated using a non-parametric test (Kruskal-  
171 Wallis test and a post-hoc Dunn test (Dinno, 2017; Dunn, 1964; Kruskal and Wallis, 1952).

172

### 173 2.7. Statistical analysis

174 All statistical analysis was done using R (R Core Team, 2016) using the phyloseq (McMurdie  
175 et al., 2017) along with the ggplot2 (Wickham, 2016), vegan (Oksanen et al., 2014), magritt  
176 (Wickham and Bache, 2014), dplyr (Wickham et al., 2018), scales (Wickham, 2017), grid  
177 (Murrell, 2004) packages. The significance of difference between time points was determined  
178 using a non-parametric test: Kruskal-Wallis test and Dunn test (Dinno, 2017; Dunn, 1964;  
179 Kruskal and Wallis, 1952).

180

### 181 3. RESULTS

#### 182 3.1. Temporal changes in the biocrust chlorophyll and chemical analyses

183 We have followed changes in the biocrust before, during and after a rain event and noted that  
184 a day after the rain (at T[1]) the biocrust in the sampling site was visibly greener than at any  
185 other sampling point (Figure 1). Following our observations, Figure 2 depicts the average  
186 chlorophyll concentrations along with the soil water content in the biocrust at each sampling  
187 point (Table A.4). The biocrust water content significantly increased between the dry season  
188 T[0] and the rain event T[R] (2.26% and 16.2%, respectively,  $p = 0.05$ ; Table A.5). Then soil  
189 moisture significantly decreased to 3.67% at T[3] ( $p < 0.05$ ). The chlorophyll concentrations  
190 significantly increased right after the rain event (from 8.45 mg chl/g soil to 14.57 mg chl/g  
191 soil, during the rain event,  $p = 0.0002$ ; Table A.5), but decreased significantly in later days  
192 (from 14.57 mg chl/g to 11.17 mg chl/g soil, three days after the rain,  $p > 0.02$ ; Table A.5).  
193 The total organic carbon (Figure A.1) and total nitrogen (Figure A.2) showed slight temporal  
194 changes (Table A.4) that were not significant (Table A.5).

195

#### 196 3.2. Temporal changes in the microbial community composition

197 Figure 3 shows the bacterial community composition at the order level for each sampling  
198 point. The community is mostly composed of *Cyanobacteria*, *Actinobacteria*, and  
199 *Proteobacteria* (Figure 3; Table A.6). During the dry season, biocrust community  
200 composition differed significantly from the community depicted during the rain event (Table  
201 A.7). The differences were shown mostly in orders belonging to the *Actinobacteria* and  
202 *Cyanobacteria* phyla (Figure 3;  $p < 0.05$ , Table A.7). The relative abundance of  
203 *Cyanobacteria*, dominated by the *Cyanobacteriales*, increased during the rain event (from  
204 22% to 41%, Table A.6;  $p < 0.05$ , Table A.7). While the relative abundance of  
205 *Actinobacteria*, dominated by *Micrococcales*, decreased during the rain event (from 50% to

206 19%, Table A.6;  $p < 0.05$ , Table A.7). In the days following the rain event, no major changes  
207 were detected in the biocrust community (Figure 3; Table A.6 and A.7).

208

### 209 3.3. Temporal changes in the microbial function

210 Figure 4 shows the predicted function based on the taxonomic composition using Piphillin  
211 (Iwai et al., 2016; Narayan et al., 2020). The values of the putative functional genes are  
212 displayed in copy number (CN). The values were mostly lower in the dry season compared to  
213 the hydration-desiccation cycle, except for light and energy sensing (Figure 4; Table A.8).  
214 These differences were shown to be statistically significant ( $p < 0.03$ ; Table A.9).

215

#### 216 4. DISCUSSION

217 In the Negev Desert, biocrust bacterial communities were shown to alter during hydration.  
218 Most apparent was the change in the relative abundance of *Cyanobacteria* which increased  
219 while the abundance of *Actinobacteria* decreased (Figure 3) similar to results obtained under  
220 controlled conditions that hydrated the biocrust to saturation (Angel and Conrad, 2013). In  
221 another controlled experiment, the filamentous cyanobacterium *Leptolyngbya sp.* isolated  
222 from desert biocrust, was shown to respond quickly to both hydration and desiccation (Oren et  
223 al., 2019, 2017). Slight increase in biocrust moisture, triggered by dew simulation, induced  
224 DNA repair and associated regulatory genes for activating the photosynthetic system of the  
225 cyanobacterium (Murik et al., 2017; Rajeev et al., 2013). However, in this study we show that  
226 during a rain event of the Negev Desert biocrust, soil moisture increased and resulted in: (i) a  
227 sharp rise in chlorophyll concentrations (Figure 2), (ii) a significant increase in the relative  
228 abundance of various cyanobacterial orders (Figure 3; Table A.6 and A.7), and (iii) a  
229 significant increase in putative phototrophy of the community (Figure 4; Table A.8 and A.9).  
230 The concentration of the chlorophyll pigment was suggested to be linked to the water content  
231 (Péli et al., 2011) and to the activity of dominating primary producer in the biocrust, i.e.,  
232 *Cyanobacteria* and/or green algae (Madigan et al., 2009). While cyanobacterial activity  
233 increased with soil moisture, no significant changes were detected in the total organic carbon  
234 and nitrogen content (Figure A.1 and A.2; Table A.4 and S5). This observation suggests that  
235 the immediate change in these parameters is negligible compared to existing soil reservoir;  
236 thus, it cannot be used as an indicator for the reaction of the local community to rain events.  
237 Moreover, it was recently proposed that in arid biocrusts, the dominant *Cyanobacteria*  
238 exchange carbon for nitrogen with copiotrophic diazotrophs, thus rapidly utilizing available  
239 nutrients and enabling the colonisation of the oligotrophic dryland soils (Couradeau et al.,  
240 2019).

241

242 In desert soil, rain events were shown to entail a decrease in the abundance of *Actinobacteria*  
243 both in the biocrust (Angel and Conrad, 2013) and topsoil (Št'ovíček et al., 2017). Members  
244 of this phylum were shown to be well adapted to living in harsh environments (Goodfellow  
245 and Williams, 1983; Zvyagintsev et al., 2007), and were found to be abundant in the Negev  
246 Highland biocrust (Meier et al., 2021). Here we showed that the increase of water content  
247 may lead to an increase in activity in all gene groups linked to energy usage or production  
248 (Figure 4; Table A.8). The generally dry biocrust experiences a narrow window of hydration  
249 conditions after a rain event of only a couple of days (Figure 2). These conditions are rapidly  
250 exploited by phototrophs before the soil dries (Figure 2 and 3), and inhibit resilient  
251 heterotrophs (Figure 3), as was previously shown in controlled (Cordero et al., 2019;  
252 Greening et al., 2016; León-Sobrino et al., 2019; Tveit et al., 2019), and naturel (León-  
253 Sobrino et al., 2019) settings.

254

255 We showed that re-hydration stage is quick and bacterial activity restarts within hours.  
256 However, during the desiccation stage, changes are slower. The biocrust dries quickly after  
257 the rain (Figure 2) due to evaporation, encouraged by the strong radiation, high winds, and  
258 low air humidity (Kidron and Tal, 2012). Yet, unlike the response to dew hydration (Oren et  
259 al., 2019, 2017), the community does not immediately inactivates. We sampled the soil along  
260 the hydration-desiccation cycle and stopped sampling when the soil was dehydrated because  
261 we expected inactivation of the community. In a previous study (Št'ovíček et al., 2017), we  
262 showed that the topsoil community bounces back to its original structure as soon as the soil  
263 dries. Yet in the biocrust, dehydration was associated by a decrease in chlorophyll  
264 concentrations, yet we detected no significant changes in the community composition (Figure  
265 3). This may be possible due to the EPS produced by the *Cyanobacteria* (Mager and Thomas,

266 2011; Mazor et al., 1996) that dominate the biocrust. *Cyanobacteria* were shown to secrete  
267 copious amounts of EPS that bind the soil particles together (Kidron et al., 2020; Kidron and  
268 Tal, 2012). The EPS in the biocrust was shown to retain water in the soil, slowing down the  
269 drying process (Roberson and Firestone, 1992). Likewise, EPS in soil was shown to create  
270 microhabitats that retain humidity (Colica et al., 2014), thus stabilising the biocrust (Lan et  
271 al., 2012), and protecting the residing microorganisms from desiccation (Mazor et al., 1996).  
272 EPS is a key component in the Negev Desert biocrusts (Kidron et al., 2020). Here we propose  
273 that EPS may benefit the microbial community by creating microhabitats in which moisture is  
274 retained longer, enabling extended active phase following a rain event. This extra time to  
275 propagate after a rain event, may justify the ample resources invested by the *Cyanobacteria* in  
276 EPS production (Mager and Thomas, 2011). To validate this hypothesis further study is  
277 required.

278

## 279 5. CONCLUSION

280 In desert biocrusts, bacterial communities must respond quickly to hydration, in order to take  
281 advantage of the short windows of opportunity to photosynthesize, and then to desiccation to  
282 prevent cells damage. Our findings reinforce controlled studies showing that biocrust  
283 hydration change the bacterial community, increasing the *Cyanobacteria* abundance over  
284 *Actinobacteria*. However, here we have shown that under field conditions the response to soil  
285 desiccation is slower, allowing for a longer period of activity and production even a day after  
286 soil moisture decrease. we speculate that the lag in response to dehydration is due to EPS-  
287 based water retention in the soil mediated by the *Cyanobacteria* producers, justifying the  
288 metabolic cost of biocrust formation.

289

290

291

292 ACKNOWLEDGEMENT

293 The authors are grateful to Lusine Ghazaryan for technical support and to Ben Poodiack for

294 editing the manuscript. This study was partially supported by the Israel Science Academy,

295 grant no. 993/11.

296

297 REFERENCES

- 298 Aanderud, Z.T., Bahr, J., Robinson, D.M., Belnap, J., Campbell, T.P., Gill, R.A., McMillian,  
299 B., St. Clair, S., 2019. The Burning of Biocrusts Facilitates the Emergence of a Bare Soil  
300 Community of Poorly-Connected Chemoheterotrophic Bacteria With Depressed  
301 Ecosystem Services. *Front. Ecol. Evol.* 7, 1–14. <https://doi.org/10.3389/fevo.2019.00467>
- 302 Agarwal, L., Qureshi, A., Kalia, V.C., Kapley, A., Purohit, H.J., Singh, R.N., 2014. Arid  
303 ecosystem: Future option for carbon sinks using microbial community intelligence. *Curr.*  
304 *Sci.* 106, 1357–1363.
- 305 Angel, R., 2012. Total Nucleic Acid Extraction from Soil.
- 306 Angel, R., Conrad, R., 2013. Elucidating the microbial resuscitation cascade in biological soil  
307 crusts following a simulated rain event. *Environ. Microbiol.* 15, 2799–2815.  
308 <https://doi.org/10.1111/1462-2920.12140>
- 309 Angel, R., Pasternak, Z., Soares, M.I.M., Conrad, R., Gillor, O., 2013. Active and total  
310 prokaryotic communities in dryland soils. *FEMS Microbiol. Ecol.* 86, 130–138.  
311 <https://doi.org/10.1111/1574-6941.12155>
- 312 Belnap, J., Lange, O.L., 2001. *Biological Soil Crusts: Structure, Function, and Management*,  
313 Springer. [https://doi.org/10.1639/0007-2745\(2002\)105\[0500:\]2.0.co;2](https://doi.org/10.1639/0007-2745(2002)105[0500:]2.0.co;2)
- 314 Bolyen, E., Rideout, J.R., Dillon, M.R., Bokulich, N.A., Abnet, C., Al-Ghalith, G.A.,  
315 Alexander, H., Alm, E.J., Arumugam, M., Asnicar, F., Bai, Y., Bisanz, J.E., Bittinger,  
316 K., Brejnrod, A., Brislawn, C.J., Brown, C.T., Callahan, B.J., Caraballo-Rodríguez,  
317 A.M., Chase, J., Cope, E., Da Silva, R., Dorrestein, P.C., Douglas, G.M., Durall, D.M.,  
318 Duvallet, C., Edwardson, C.F., Ernst, M., Estaki, M., Fouquier, J., Gauglitz, J.M.,  
319 Gibson, D.L., Gonzalez, A., Gorlick, K., Guo, J., Hillmann, B., Holmes, S., Holste, H.,  
320 Huttenhower, C., Huttley, G., Janssen, S., Jarmusch, A.K., Jiang, L., Kaehler, B., Kang,  
321 K. Bin, Keefe, C.R., Keim, P., Kelley, S.T., Knights, D., Koester, I., Kosciolk, T.,



- 322 Kreps, J., Langille, M.G.I., Lee, J., Ley, R., Liu, Y.-X., Loftfield, E., Lozupone, C.,  
323 Maher, M., Marotz, C., Martin, B.D., McDonald, D., McIver, L.J., Melnik, A. V,  
324 Metcalf, J.L., Morgan, S.C., Morton, J., Naimey, A.T., Navas-Molina, J.A., Nothias,  
325 L.F., Orchanian, S.B., Pearson, T., Peoples, S.L., Petras, D., Preuss, M.L., Pruesse, E.,  
326 Rasmussen, L.B., Rivers, A., Robeson Michael S, I.I., Rosenthal, P., Segata, N., Shaffer,  
327 M., Shiffer, A., Sinha, R., Song, S.J., Spear, J.R., Swafford, A.D., Thompson, L.R.,  
328 Torres, P.J., Trinh, P., Tripathi, A., Turnbaugh, P.J., Ul-Hasan, S., van der Hooft, J.J.J.,  
329 Vargas, F., Vázquez-Baeza, Y., Vogtmann, E., von Hippel, M., Walters, W., Wan, Y.,  
330 Wang, M., Warren, J., Weber, K.C., Williamson, C.H.D., Willis, A.D., Xu, Z.Z.,  
331 Zaneveld, J.R., Zhang, Y., Zhu, Q., Knight, R., Caporaso, J.G., 2018. QIIME 2:  
332 Reproducible, interactive, scalable, and extensible microbiome data science. *PeerJ Prepr.*  
333 6, e27295v2. <https://doi.org/10.7287/peerj.preprints.27295v2>
- 334 Borisov, V.B., Forte, E., Davletshin, A., Mastronicola, D., Sarti, P., Giuffrè, A., 2013.  
335 Cytochrome bd oxidase from *Escherichia coli* displays high catalase activity: An  
336 additional defense against oxidative stress. *FEBS Lett.* 587, 2214–2218.  
337 <https://doi.org/10.1016/j.febslet.2013.05.047>
- 338 Bowker, M.A., Reed, S.C., Maestre, F.T., Eldridge, D.J., 2018. Biocrusts: the living skin of  
339 the earth. *Plant Soil* 429, 1–7. <https://doi.org/10.1007/s11104-018-3735-1>
- 340 Callahan, B.J., McMurdie, P.J., Rosen, M.J., Han, A.W., Johnson, A.J.A., Holmes, S.P., 2016.  
341 DADA2: High-resolution sample inference from Illumina amplicon data. *Nat. Methods*  
342 13, 581–583. <https://doi.org/10.1038/nmeth.3869>
- 343 Cameron, R.E., Blank, G.B., 1966. Desert algae: soil crusts and diaphanous substrata as algal  
344 habitats.
- 345 Campbell, S.E., Seeler, J., Golubic, S., 1989. Desert crust formation and soil stabilization.  
346 *Arid Soil Res. Rehabil.* 3, 217–228. <https://doi.org/10.1080/15324988909381200>

- 347 Castillo-Monroy, A.P., Maestre, F.T., Rey, A., Soliveres, S., Garc??a-Palacios, P., 2011.  
348 Biological Soil Crust Microsites Are the Main Contributor to Soil Respiration in a  
349 Semiarid Ecosystem. *Ecosystems* 14, 835–847. [https://doi.org/10.1007/s10021-011-](https://doi.org/10.1007/s10021-011-9449-3)  
350 9449-3
- 351 Castle, S.C., Morrison, C.D., Barger, N.N., 2010. Extraction of chlorophyll a from biological  
352 soil crusts: A comparison of solvents for spectrophotometric determination. *Soil Biol.*  
353 *Biochem.* 43, 853–856. <https://doi.org/10.1016/j.soilbio.2010.11.025>
- 354 Colica, G., Li, H., Rossi, F., Li, D., Liu, Y., De Philippis, R., 2014. Microbial secreted  
355 exopolysaccharides affect the hydrological behavior of induced biological soil crusts in  
356 desert sandy soils. *Soil Biol. Biochem.* 68, 62–70.  
357 <https://doi.org/10.1016/j.soilbio.2013.09.017>
- 358 Cordero, P.R.F., Bayly, K., Man Leung, P., Huang, C., Islam, Z.F., Schittenhelm, R.B., King,  
359 G.M., Greening, C., 2019. Atmospheric carbon monoxide oxidation is a widespread  
360 mechanism supporting microbial survival. *ISME J.* 13, 2868–2881.  
361 <https://doi.org/10.1038/s41396-019-0479-8>
- 362 Couradeau, E., Giraldo-Silva, A., De Martini, F., Garcia-Pichel, F., 2019. Spatial segregation  
363 of the biological soil crust microbiome around its foundational cyanobacterium,  
364 *Microcoleus vaginatus*, and the formation of a nitrogen-fixing cyanosphere. *Microbiome*  
365 7, 1–12. <https://doi.org/10.1186/s40168-019-0661-2>
- 366 Dinno, A., 2017. Package ‘dunn.test.’ CRAN Repos. 1–7.
- 367 Dunn, O.J., 1964. Multiple Comparisons Using Rank Sums. *Technometrics* 6, 241–252.
- 368 Goodfellow, M., Williams, S.T., 1983. Ecology of actinomycetes. *Annu. Rev. Microbiol.* 37,  
369 189–216. <https://doi.org/10.1146/annurev.mi.37.100183.001201>
- 370 Greening, C., Biswas, A., Carere, C.R., Jackson, C.J., Taylor, M.C., Stott, M.B., Cook, G.M.,  
371 Morales, S.E., 2016. Genomic and metagenomic surveys of hydrogenase distribution

- 372 indicate H<sub>2</sub> is a widely utilised energy source for microbial growth and survival. *ISME*  
373 *J.* 10, 761–777. <https://doi.org/10.1038/ismej.2015.153>
- 374 Halverson, L.J., Jones, T.M., Firestone, M.K., 2000. Release of Intracellular Solutes by Four  
375 Soil Bacteria Exposed to Dilution Stress. *Soil Sci. Soc. Am. J.* 64, 1630–1637.  
376 <https://doi.org/10.2136/sssaj2000.6451630x>
- 377 Hansen, B.B., Henriksen, S., Aanes, R., Sæther, B.E., 2007. Ungulate impact on vegetation in  
378 a two-level trophic system. *Polar Biol.* 30, 549–558. [https://doi.org/10.1007/s00300-006-](https://doi.org/10.1007/s00300-006-0212-8)  
379 [0212-8](https://doi.org/10.1007/s00300-006-0212-8)
- 380 Harris, R.F., 1981. Effect of Water Potential on Microbial Growth and Activity. *Water*  
381 *Potential Relations Soil Microbiol.*, SSSA Special Publications.  
382 <https://doi.org/https://doi.org/10.2136/sssaspecpub9.c2>
- 383 Henrikus, S.S., Wood, E.A., McDonald, J.P., Cox, M.M., Woodgate, R., Goodman, M.F., van  
384 Oijen, A.M., Robinson, A., 2018. DNA polymerase IV primarily operates outside of  
385 DNA replication forks in *Escherichia coli*. *PLoS Genet.* 14, 1–29.  
386 <https://doi.org/10.1371/journal.pgen.1007161>
- 387 Hoogsteen, M.J.J., Lantinga, E.A., Bakker, E.J., Groot, J.C.J., Tittoneil, P.A., 2015.  
388 Estimating soil organic carbon through loss on ignition: Effects of ignition conditions  
389 and structural water loss. *Eur. J. Soil Sci.* 66, 320–328.  
390 <https://doi.org/10.1111/ejss.12224>
- 391 Iwai, S., Weinmaier, T., Schmidt, B.L., Albertson, D.G., Poloso, N.J., Dabbagh, K., DeSantis,  
392 T.Z., 2016. Piphillin: Improved prediction of metagenomic content by direct inference  
393 from human microbiomes. *PLoS One* 11, 1–18.  
394 <https://doi.org/10.1371/journal.pone.0166104>
- 395 Kaneshisa, M., Goto, S., 2000. KEGG: Kyoto Encyclopedia of Genes and Genomes. *Nucleic*  
396 *Acids Res.* 28, 27–30. <https://doi.org/10.3892/ol.2020.11439>

- 397 Kedem, I., Treves, H., Noble, G., Hagemann, M., Murik, O., Raanan, H., Oren, N., Giordano,  
398 M., Kaplan, A., 2020. Keep your friends close and your competitors closer: novel  
399 interspecies interaction in desert biological sand crusts. *Phycologia* 00, 1–8.  
400 <https://doi.org/10.1080/00318884.2020.1843349>
- 401 Kidron, G.J., Herrnstadt, I., Barzilay, E., 2002. The role of dew as a moisture source for sand  
402 microbiotic crusts in the Negev Desert, Israel. *J. Arid Environ.* 52, 517–533.  
403 <https://doi.org/10.1006/jare.2002.1014>
- 404 Kidron, G.J., Tal, S.Y., 2012. The effect of biocrusts on evaporation from sand dunes in the  
405 Negev Desert. *Geoderma* 179–180, 104–112.  
406 <https://doi.org/10.1016/j.geoderma.2012.02.021>
- 407 Kidron, G.J., Wang, Y., Herzberg, M., 2020. Exopolysaccharides may increase biocrust  
408 rigidity and induce runoff generation. *J. Hydrol.* 588, 125081.  
409 <https://doi.org/10.1016/j.jhydrol.2020.125081>
- 410 Klindworth, A., Pruesse, E., Schweer, T., Peplies, J., Quast, C., Horn, M., Glöckner, F.O.,  
411 2013. Evaluation of general 16S ribosomal RNA gene PCR primers for classical and  
412 next-generation sequencing-based diversity studies. *Nucleic Acids Res.* 41, 1–11.  
413 <https://doi.org/10.1093/nar/gks808>
- 414 Kruskal, W.H., Wallis, W.A., 1952. Use of Ranks in One-Criterion Variance Analysis. *J. Am.*  
415 *Stat. Assoc.* 47, 583–621. <https://doi.org/10.1080/01621459.1952.10483441>
- 416 Lan, S., Wu, L., Zhang, D., Hu, C., 2012. Successional stages of biological soil crusts and  
417 their microstructure variability in Shapotou region (China). *Environ. Earth Sci.* 65, 77–  
418 88. <https://doi.org/10.1007/s12665-011-1066-0>
- 419 Lennon, J.T., Jones, S.E., 2011. Microbial seed banks: The ecological and evolutionary  
420 implications of dormancy. *Nat. Rev. Microbiol.* 9, 119–130.  
421 <https://doi.org/10.1038/nrmicro2504>

- 422 León-Sobrino, C., Ramond, J.B., Maggs-Kölling, G., Cowan, D.A., 2019. Nutrient  
423 acquisition, rather than stress response over diel cycles, drives microbial transcription in  
424 a hyper-arid Namib desert soil. *Front. Microbiol.* 10, 1–11.  
425 <https://doi.org/10.3389/fmicb.2019.01054>
- 426 Leung, P.M., Bay, S.K., Meier, D. V., Chiri, E., Cowan, D.A., Gillor, O., Woebken, D.,  
427 Greening, C., 2020. Energetic Basis of Microbial Growth and Persistence in Desert  
428 Ecosystems. *mSystems* 5, 1–14. <https://doi.org/10.1128/msystems.00495-19>
- 429 Madigan, M.T., Martinko, J.M., Dunlap, P. V, Clark, D.P., 2009. *Brock Biology of*  
430 *microorganisms.*
- 431 Mager, D.M., Thomas, A.D., 2011. Extracellular polysaccharides from cyanobacterial soil  
432 crusts: A review of their role in dryland soil processes. *J. Arid Environ.* 75, 91–97.  
433 <https://doi.org/10.1016/j.jaridenv.2010.10.001>
- 434 Malek, E., McCurdy, G., Giles, B., 1999. Dew contribution to the annual water balances in  
435 semi-arid desert valleys. *J. Arid Environ.* 42, 71–80.  
436 <https://doi.org/10.1006/jare.1999.0506>
- 437 Mazor, G., Kidron, G.J., Vonshak, A., Abeliovich, A., 1996. The role of cyanobacterial  
438 exopolysaccharides in structuring desert microbial crusts. *FEMS Microbiol. Ecol.* 21,  
439 121–130. [https://doi.org/10.1016/0168-6496\(96\)00050-5](https://doi.org/10.1016/0168-6496(96)00050-5)
- 440 McMurdie, P.J., Holmes, S., Jordan, G., Chamberlain, S., 2017. Phyloseq: handling and  
441 analysis of high-throughput microbiome census data.
- 442 Meier, D. V., Imminger, S., Gillor, O., Woebken, D., 2021. Distribution of Mixotrophy and  
443 Desiccation Survival Mechanisms across Microbial Genomes in an Arid Biological Soil  
444 Crust Community. *mSystems* 6, 1–20. <https://doi.org/10.1128/msystems.00786-20>
- 445 Meier, D. V, Imminger, S., Gillor, O., Woebken, D., 2020. Versatility of energy metabolism  
446 and drought survival strategies characterize microbial genomes in biological soil crust.

- 447 Prep.
- 448 Murik, O., Oren, N., Shotland, Y., Raanan, H., Treves, H., Kedem, I., Keren, N., Hagemann,  
449 M., Pade, N., Kaplan, A., 2017. What distinguishes cyanobacteria able to revive after  
450 desiccation from those that cannot: the genome aspect. *Environ. Microbiol.* 19, 535–550.  
451 <https://doi.org/10.1111/1462-2920.13486>
- 452 Murrell, P., 2004. grid Graphics Creating and Controlling Graphics Regions and Co- ordinate  
453 Systems. *Differences* 1–17. <https://doi.org/doi:10.1201/b10966-6>
- 454 Narayan, N.R., Weinmaier, T., Laserna-Mendieta, E.J., Claesson, M.J., Shanahan, F.,  
455 Dabbagh, K., Iwai, S., Desantis, T.Z., 2020. Piphillin predicts metagenomic composition  
456 and dynamics from DADA2- corrected 16S rDNA sequences. *BMC Genomics* 21, 1–12.  
457 <https://doi.org/10.1186/s12864-020-6537-9>
- 458 Oksanen, J., Blanchet, F.G., Kindt, R., Legendre, P., Minchin, P.R., Hara, R.B.O., Simpson,  
459 G.L., Solymos, P., Stevens, M.H.H., 2014. Package ‘vegan.’ [https://doi.org/ISBN 0-](https://doi.org/ISBN%200-387-95457-0)  
460 [387-95457-0](https://doi.org/ISBN%200-387-95457-0)
- 461 Oren, N., Raanan, H., Kedem, I., Turjeman, A., Bronstein, M., Kaplan, A., Murik, O., 2019.  
462 Desert cyanobacteria prepare in advance for dehydration and rewetting: The role of light  
463 and temperature sensing. *Mol. Ecol.* 28, 2305–2320. <https://doi.org/10.1111/mec.15074>
- 464 Oren, N., Raanan, H., Murik, O., Keren, N., Kaplan, A., 2017. Dawn illumination prepares  
465 desert cyanobacteria for dehydration. *Curr. Biol.* 27, R1056–R1057.  
466 <https://doi.org/10.1016/j.cub.2017.08.027>
- 467 Péli, E.R., Lei, N., Pócs, T., Laufer, Z., Porembski, S., Tuba, Z., 2011. Ecophysiological  
468 responses of desiccation-tolerant cryptobiotic crusts. *Cent. Eur. J. Biol.* 6, 838–849.  
469 <https://doi.org/10.2478/s11535-011-0049-1>
- 470 Pointing, S.B., Belnap, J., 2012. Microbial colonization and controls in dryland systems. *Nat.*  
471 *Rev. Microbiol.* 10, 551–562. <https://doi.org/10.1038/nrmicro2831>

- 472 Preiss, J., 1984. Bacterial glycogen synthesis and its regulation. *Annu. Rev. Microbiol.* 38,  
473 419–458.
- 474 Preiss, J., Sivak, M., 1999. 3.14 - Starch and Glycogen Biosynthesis, in: Barton, S.D.,  
475 Nakanishi, K., Meth-Cohn, O.B.T.-C.N.P.C. (Eds.), . Pergamon, Oxford, pp. 441–495.  
476 <https://doi.org/https://doi.org/10.1016/B978-0-08-091283-7.00082-5>
- 477 Quast, C., Pruesse, E., Yilmaz, P., Gerken, J., Schweer, T., Yarza, P., Peplies, J., Glöckner,  
478 F.O., 2013. The SILVA ribosomal RNA gene database project: improved data processing  
479 and web-based tools. *Nucleic Acids Res.* 41, D590–D596.  
480 <https://doi.org/10.1093/nar/gks1219>
- 481 R Core Team, I., 2016. R: A language and environment for statistical computing [WWW  
482 Document]. R Found. Stat. Comput. URL <http://www.r-project.org>
- 483 Rajeev, L., Da Rocha, U.N., Klitgord, N., Luning, E.G., Fortney, J., Axen, S.D., Shih, P.M.,  
484 Bouskill, N.J., Bowen, B.P., Kerfeld, C.A., Garcia-Pichel, F., Brodie, E.L., Northen,  
485 T.R., Mukhopadhyay, A., 2013. Dynamic cyanobacterial response to hydration and  
486 dehydration in a desert biological soil crust. *ISME J.* 7, 2178–2191.  
487 <https://doi.org/10.1038/ismej.2013.83>
- 488 Repar, J., Briski, N., Buljubašić, M., Zahradka, K., Zahradka, D., 2012. Exonuclease VII is  
489 involved in “reckless” DNA degradation in UV-irradiated *Escherichia coli*. *Mutat. Res.*  
490 750. <https://doi.org/10.1016/j.mrgentox.2012.10.005>
- 491 Ritchie, R.J., 2006. Consistent sets of spectrophotometric chlorophyll equations for acetone,  
492 methanol and ethanol solvents. *Photosynth. Res.* 89, 27–41.  
493 <https://doi.org/10.1007/s11120-006-9065-9>
- 494 Roberson, E.B., Firestone, M.K., 1992. Relationship between desiccation and  
495 exopolysaccharide production in a soil *Pseudomonas* sp. *Appl. Environ. Microbiol.* 58,  
496 1284–1291. <https://doi.org/10.1128/aem.58.4.1284-1291.1992>

- 497 Scrimgeour, C., 2008. Soil Sampling and Methods of Analysis (Second Edition),  
498 Experimental Agriculture. <https://doi.org/10.1017/s0014479708006546>
- 499 Sklarz, M.Y., Levin, L., Gordon, M., Chalifa-Caspi, V., 2018. NeatSeq-Flow: A Lightweight  
500 High Throughput Sequencing Workflow Platform for Non-Programmers and  
501 Programmers alike. bioRxiv 173005. <https://doi.org/10.1101/173005>
- 502 Slade, D., Radman, M., 2011. Oxidative Stress Resistance in *Deinococcus radiodurans*,  
503 Microbiology and Molecular Biology Reviews. <https://doi.org/10.1128/mmbr.00015-10>
- 504 Št'oviček, A., Kim, M., Or, D., Gillor, O., 2017. Microbial community response to hydration-  
505 desiccation cycles in desert soil. *Sci. Rep.* 7, 45735. <https://doi.org/10.1038/srep45735>
- 506 Sukenik, A., Kaplan-Levy, R.N., Welch, J.M., Post, A.F., 2012. Massive multiplication of  
507 genome and ribosomes in dormant cells (akinetes) of *Aphanizomenon ovalisporum*  
508 (Cyanobacteria). *ISME J.* 6, 670–679. <https://doi.org/10.1038/ismej.2011.128>
- 509 Sunyer-Figueres, M., Wang, C., Mas, A., 2018. Analysis of ribosomal RNA stability in dead  
510 cells of wine yeast by quantitative PCR. *Int. J. Food Microbiol.* 270, 1–4.  
511 <https://doi.org/10.1016/j.ijfoodmicro.2018.01.020>
- 512 Tveit, A.T., Hestnes, A.G., Robinson, S.L., Schintlmeister, A., Dedysh, S.N., Jehmlich, N.,  
513 Von Bergen, M., Herbold, C., Wagner, M., Richter, A., Svenning, M.M., 2019.  
514 Widespread soil bacterium that oxidizes atmospheric methane. *Proc. Natl. Acad. Sci. U.*  
515 *S. A.* 116, 8515–8524. <https://doi.org/10.1073/pnas.1817812116>
- 516 Wickham, H., 2017. R: Package ‘scales.’ Cran.
- 517 Wickham, H., 2016. Ggplot2: Elegant graphics for data analysis.
- 518 Wickham, H., Bache, S.M., 2014. Magrittr: A forward-pipe operator for R.
- 519 Wickham, H., Francois, R., Henry, L., Müller, K., 2018. Package “dplyr.”
- 520 Wu, L., Lan, S., Zhang, D., Hu, C., 2013. Recovery of chlorophyll fluorescence and  
521 CO<sub>2</sub>exchange in lichen soil crusts after rehydration. *Eur. J. Soil Biol.* 55, 77–82.



522 <https://doi.org/10.1016/j.ejsobi.2012.12.006>

523 Zvyagintsev, D.G., Zenova, G.M., Doroshenko, E.A., Gryadunova, A.A., Gracheva, T.A.,

524 Sudnitsyn, I.I., 2007. Actinomycete growth in conditions of low moisture. *Biol. Bull.* 34,

525 242–247. <https://doi.org/10.1134/S1062359007030053>

526

527

528 APPENDIX A

529 Table A.1. Primers used in this study

530

|                | Primer name | Primers (5' – 3')      | Reference                 |
|----------------|-------------|------------------------|---------------------------|
| 16S rRNA       | V3F(341)    | CCTACGGGAGGCAGCAG      | (Klindworth et al., 2013) |
|                | V4R(515)    | TTACCGCGGCKGCTGGCAC    |                           |
|                | V4R(806)    | GGACTACHVGGGTWTCTAAT   |                           |
| Universal tags | CS1         | ACACTGACGACATGGTTCTACA |                           |
|                | CS2         | TACGGTAGCAGAGACTTGGTCT |                           |

531

532

533 Table A.2. Statistics from Dada2

| <b>Sample<br/>(Time<br/>point)</b> | <b>Input</b> | <b>Filtered</b> | <b>Percentage<br/>of input<br/>passed<br/>filter</b> | <b>Denoised</b> | <b>Non-<br/>chimeric</b> | <b>Percentage<br/>of input<br/>non-<br/>chimeric</b> |
|------------------------------------|--------------|-----------------|------------------------------------------------------|-----------------|--------------------------|------------------------------------------------------|
| T[R]                               | 99090        | 87403           | 88.21                                                | 76272           | 68762                    | 69.39                                                |
| T[R]                               | 102014       | 87207           | 85.49                                                | 75796           | 64954                    | 63.67                                                |
| T[R]                               | 107763       | 94407           | 87.61                                                | 80242           | 72676                    | 67.44                                                |
| T[R]                               | 94175        | 81352           | 86.38                                                | 69460           | 61519                    | 65.32                                                |
| T[R]                               | 97752        | 85658           | 87.63                                                | 76694           | 65590                    | 67.10                                                |
| T[1]                               | 102147       | 89670           | 87.79                                                | 79436           | 68611                    | 67.17                                                |
| T[1]                               | 110406       | 96638           | 87.53                                                | 86745           | 76384                    | 69.18                                                |
| T[1]                               | 94247        | 81576           | 86.56                                                | 72289           | 65755                    | 69.77                                                |
| T[1]                               | 107731       | 94180           | 87.42                                                | 83504           | 72831                    | 67.60                                                |
| T[1]                               | 96982        | 84993           | 87.64                                                | 77197           | 67547                    | 69.65                                                |
| T[2]                               | 95525        | 82453           | 86.32                                                | 73811           | 63892                    | 66.89                                                |
| T[2]                               | 90500        | 79303           | 87.63                                                | 75977           | 74636                    | 82.47                                                |
| T[2]                               | 84648        | 74376           | 87.87                                                | 71060           | 69017                    | 81.53                                                |
| T[2]                               | 96778        | 85143           | 87.98                                                | 75971           | 66483                    | 68.70                                                |
| T[2]                               | 83749        | 72395           | 86.44                                                | 65649           | 60857                    | 72.67                                                |
| T[3]                               | 85527        | 74977           | 87.66                                                | 66324           | 56872                    | 66.50                                                |
| T[3]                               | 92648        | 81056           | 87.49                                                | 74512           | 67015                    | 72.33                                                |
| T[3]                               | 98388        | 86526           | 87.94                                                | 78048           | 69910                    | 71.06                                                |
| T[3]                               | 92219        | 79938           | 86.68                                                | 69799           | 62666                    | 67.95                                                |
| T[3]                               | 88140        | 77515           | 87.95                                                | 73273           | 72113                    | 81.82                                                |
| T[0]                               | 22095        | 21646           | 97.97                                                | 19900           | 12628                    | 57.15                                                |
| T[0]                               | 23457        | 22888           | 97.57                                                | 18342           | 11627                    | 49.57                                                |
| T[0]                               | 26072        | 25368           | 97.30                                                | 20726           | 12867                    | 49.35                                                |

534

535

536 Table A.3. List of the genes used for function prediction ordered by groups and subgroups.

| <b>Group</b>            | <b>Metabolic traits</b>      | <b>KE GG ID</b> | <b>Function</b>                                                          |
|-------------------------|------------------------------|-----------------|--------------------------------------------------------------------------|
| <b>DNA conservation</b> | Putative DNA-binding protein | K02524          | K10; DNA binding protein (fs(1)K10, female sterile(1)K10)                |
|                         | Putative DNA-binding protein | K03111          | ssb; single-strand DNA-binding protein                                   |
|                         | Putative DNA-binding protein | K03530          | hupB; DNA-binding protein HU-beta                                        |
|                         | Putative DNA-binding protein | K03622          | ssh10b; archaea-specific DNA-binding protein                             |
|                         | Putative DNA-binding protein | K03746          | hns; DNA-binding protein H-NS                                            |
|                         | Putative DNA-binding protein | K04047          | dps; starvation-inducible DNA-binding protein                            |
|                         | Putative DNA-binding protein | K04494          | CHD8, HELSNF1; chromodomain helicase DNA binding protein 8 [EC:3.6.4.12] |
|                         | Putative DNA-binding protein | K04680          | ID1; DNA-binding protein inhibitor ID1                                   |
|                         | Putative DNA-binding protein | K05516          | cbpA; curved DNA-binding protein                                         |
|                         | Putative DNA-binding protein | K05732          | ARHGAP35, GRLF1; glucocorticoid receptor DNA-binding factor 1            |
|                         | Putative DNA-binding protein | K05787          | hupA; DNA-binding protein HU-alpha                                       |
|                         | Putative DNA-binding protein | K09061          | GCF, C2orf3; GC-rich sequence DNA-binding factor                         |
|                         | Putative DNA-binding protein | K09423          | BAS1; Myb-like DNA-binding protein BAS1                                  |
|                         | Putative DNA-binding protein | K09424          | REB1; Myb-like DNA-binding protein REB1                                  |
|                         | Putative DNA-binding protein | K09425          | K09425; Myb-like DNA-binding protein FlbD                                |
|                         | Putative DNA-binding protein | K09426          | RAP1; Myb-like DNA-binding protein RAP1                                  |

|                              |            |                                                                           |
|------------------------------|------------|---------------------------------------------------------------------------|
| Putative DNA-binding protein | K10<br>140 | DDB2; DNA damage-binding protein 2                                        |
| Putative DNA-binding protein | K10<br>610 | DDB1; DNA damage-binding protein 1                                        |
| Putative DNA-binding protein | K10<br>728 | TOPBP1; topoisomerase (DNA) II binding protein 1                          |
| Putative DNA-binding protein | K10<br>748 | tus, tau; DNA replication terminus site-binding protein                   |
| Histone-like protein         | K10<br>752 | RBBP4, HAT2, CAF1, MIS16; histone-binding protein RBBP4                   |
| Putative DNA-binding protein | K10<br>979 | ku; DNA end-binding protein Ku                                            |
| Putative DNA-binding protein | K11<br>367 | CHD1; chromodomain-helicase-DNA-binding protein 1 [EC:3.6.4.12]           |
| Histone-like protein         | K11<br>495 | CENPA; histone H3-like centromeric protein A                              |
| Putative DNA-binding protein | K11<br>574 | CBF2, CBF3A, CTF14; centromere DNA-binding protein complex CBF3 subunit A |
| Putative DNA-binding protein | K11<br>575 | CEP3, CBF3B; centromere DNA-binding protein complex CBF3 subunit B        |
| Putative DNA-binding protein | K11<br>576 | CTF13, CBF3C; centromere DNA-binding protein complex CBF3 subunit C       |
| Putative DNA-binding protein | K11<br>642 | CHD3, MI2A; chromodomain-helicase-DNA-binding protein 3 [EC:3.6.4.12]     |
| Putative DNA-binding protein | K11<br>643 | CHD4, MI2B; chromodomain-helicase-DNA-binding protein 4 [EC:3.6.4.12]     |
| Histone-like protein         | K11<br>659 | RBBP7; histone-binding protein RBBP7                                      |
| Putative DNA-binding protein | K11<br>685 | stpA; DNA-binding protein StpA                                            |
| Putative DNA-binding protein | K12<br>965 | ZBP1, DAI; Z-DNA binding protein 1                                        |
| Putative DNA-binding protein | K13<br>102 | KIN; DNA/RNA-binding protein KIN17                                        |
| Putative DNA-binding protein | K13<br>211 | GCFC; GC-rich sequence DNA-binding factor                                 |
| Putative DNA-binding protein | K14<br>435 | CHD5; chromodomain-helicase-DNA-binding protein 5 [EC:3.6.4.12]           |

|                              |            |                                                                                                                       |
|------------------------------|------------|-----------------------------------------------------------------------------------------------------------------------|
| Putative DNA-binding protein | K14<br>436 | CHD6; chromodomain-helicase-DNA-binding protein 6 [EC:3.6.4.12]                                                       |
| Putative DNA-binding protein | K14<br>437 | CHD7; chromodomain-helicase-DNA-binding protein 7 [EC:3.6.4.12]                                                       |
| Putative DNA-binding protein | K14<br>438 | CHD9; chromodomain-helicase-DNA-binding protein 9 [EC:3.6.4.12]                                                       |
| Putative DNA-binding protein | K14<br>507 | ORCA2_3; AP2-domain DNA-binding protein ORCA2/3                                                                       |
| Histone-like protein         | K15<br>719 | NCOAT, MGEA5; protein O-GlcNAcase / histone acetyltransferase [EC:3.2.1.169 2.3.1.48]                                 |
| Putative DNA-binding protein | K16<br>640 | ssh7; DNA-binding protein 7 [EC:3.1.27.-]                                                                             |
| Putative DNA-binding protein | K17<br>693 | ID2; DNA-binding protein inhibitor ID2                                                                                |
| Putative DNA-binding protein | K17<br>694 | ID3; DNA-binding protein inhibitor ID3                                                                                |
| Putative DNA-binding protein | K17<br>695 | ID4; DNA-binding protein inhibitor ID4                                                                                |
| Putative DNA-binding protein | K17<br>696 | EMC; DNA-binding protein inhibitor ID, other                                                                          |
| Histone-like protein         | K18<br>710 | SLBP; histone RNA hairpin-binding protein                                                                             |
| Putative DNA-binding protein | K18<br>946 | gp32, ssb; single-stranded DNA-binding protein                                                                        |
| Putative DNA-binding protein | K19<br>442 | ICP8, DBP, UL29; Simplexvirus major DNA-binding protein                                                               |
| Histone-like protein         | K19<br>799 | RPH1; DNA damage-responsive transcriptional repressor / [histone H3]-trimethyl-L-lysine36 demethylase [EC:1.14.11.69] |
| Putative DNA-binding protein | K20<br>091 | CHD2; chromodomain-helicase-DNA-binding protein 2 [EC:3.6.4.12]                                                       |
| Putative DNA-binding protein | K20<br>092 | CHD1L; chromodomain-helicase-DNA-binding protein 1-like [EC:3.6.4.12]                                                 |
| Putative DNA-binding protein | K22<br>592 | AHDC1; AT-hook DNA-binding motif-containing protein 1                                                                 |
| Putative DNA-binding protein | K23<br>225 | SATB1; DNA-binding protein SATB1                                                                                      |
| Putative DNA-binding         | K23<br>226 | SATB2; DNA-binding protein SATB2                                                                                      |

|                                              |                               |                  |                                                                               |
|----------------------------------------------|-------------------------------|------------------|-------------------------------------------------------------------------------|
|                                              | protein                       |                  |                                                                               |
|                                              | Putative DNA-binding protein  | K23600           | TARDBP, TDP43; TAR DNA-binding protein 43                                     |
| <b>DNA repair</b>                            | DNA polymerase PolA (COG0258) | K02320           | POLA1; DNA polymerase alpha subunit A [EC:2.7.7.7]                            |
|                                              | DNA polymerase PolA (COG0258) | K02321           | POLA2; DNA polymerase alpha subunit B                                         |
|                                              | DNA polymerase PolA (COG0258) | K02335           | polA; DNA polymerase I [EC:2.7.7.7]                                           |
|                                              | DNA polymerase IV             | K02346           | dinB; DNA polymerase IV [EC:2.7.7.7]                                          |
|                                              | Exodeoxyribonuclease VII      | K03601           | xseA; exodeoxyribonuclease VII large subunit [EC:3.1.11.6]                    |
|                                              | Exodeoxyribonuclease VII      | K03602           | xseB; exodeoxyribonuclease VII small subunit [EC:3.1.11.6]                    |
|                                              | DNA polymerase IV             | K04479           | dbh; DNA polymerase IV (archaeal DinB-like DNA polymerase) [EC:2.7.7.7]       |
|                                              | Exodeoxyribonuclease VII      | K10906           | recE; exodeoxyribonuclease VIII [EC:3.1.11.-]                                 |
|                                              | DNA polymerase IV             | K10981           | POL4; DNA polymerase IV [EC:2.7.7.7]                                          |
|                                              | DNA polymerase IV             | K16250           | NRPD1; DNA-directed RNA polymerase IV subunit 1 [EC:2.7.7.6]                  |
|                                              | DNA polymerase IV             | K16252           | NRPD2, NRPE2; DNA-directed RNA polymerase IV and V subunit 2 [EC:2.7.7.6]     |
|                                              | DNA polymerase IV             | K16253           | NRPD7, NRPE7; DNA-directed RNA polymerase IV and V subunit 7                  |
|                                              | <b>Litotrophy</b>             | NiFe hydrogenase | K00437                                                                        |
| NiFe hydrogenase                             |                               | K02587           | nifE; nitrogenase molybdenum-cofactor synthesis protein NifE                  |
| CO-dehydrogenase CoxM & CoxS                 |                               | K03518           | coxS; aerobic carbon-monoxide dehydrogenase small subunit [EC:1.2.5.3]        |
| CO-dehydrogenase CoxM & CoxS                 |                               | K03519           | coxM, cutM; aerobic carbon-monoxide dehydrogenase medium subunit [EC:1.2.5.3] |
| CO-dehydrogenase large subunit (coxL) Form I |                               | K03520           | coxL, cutL; aerobic carbon-monoxide dehydrogenase large subunit [EC:1.2.5.3]  |
| NiFe hydrogenase                             |                               | K05586           | hoxE; bidirectional [NiFe] hydrogenase diaphorase subunit [EC:7.1.1.2]        |
| NiFe hydrogenase                             |                               | K05587           | hoxF; bidirectional [NiFe] hydrogenase diaphorase subunit [EC:7.1.1.2]        |
| NiFe hydrogenase                             |                               | K05588           | hoxU; bidirectional [NiFe] hydrogenase diaphorase subunit [EC:7.1.1.2]        |

|                                |            |                                                                        |
|--------------------------------|------------|------------------------------------------------------------------------|
| SOX sulfur-oxidation system    | K17<br>218 | sqr; sulfide:quinone oxidoreductase [EC:1.8.5.4]                       |
| SOX sulfur-oxidation system    | K17<br>222 | soxA; L-cysteine S-thiosulfotransferase [EC:2.8.5.2]                   |
| SOX sulfur-oxidation system    | K17<br>223 | soxX; L-cysteine S-thiosulfotransferase [EC:2.8.5.2]                   |
| SOX sulfur-oxidation system    | K17<br>224 | soxB; S-sulfosulfanyl-L-cysteine sulfohydrolase [EC:3.1.6.20]          |
| SOX sulfur-oxidation system    | K17<br>225 | soxC; sulfane dehydrogenase subunit SoxC                               |
| SOX sulfur-oxidation system    | K17<br>226 | soxY; sulfur-oxidizing protein SoxY                                    |
| SOX sulfur-oxidation system    | K17<br>227 | soxZ; sulfur-oxidizing protein SoxZ                                    |
| NiFe hydrogenase               | K18<br>005 | hoxF; [NiFe] hydrogenase diaphorase moiety large subunit [EC:1.12.1.2] |
| NiFe hydrogenase               | K18<br>006 | hoxU; [NiFe] hydrogenase diaphorase moiety small subunit [EC:1.12.1.2] |
| NiFe hydrogenase               | K18<br>008 | hydA; [NiFe] hydrogenase small subunit [EC:1.12.2.1]                   |
| Propane monoxygenase (soluble) | K18<br>223 | prmA; propane 2-monoxygenase large subunit [EC:1.14.13.227]            |
| Propane monoxygenase (soluble) | K18<br>224 | prmC; propane 2-monoxygenase small subunit [EC:1.14.13.227]            |
| Propane monoxygenase (soluble) | K18<br>225 | prmB; propane monoxygenase reductase component [EC:1.18.1.-]           |
| Propane monoxygenase (soluble) | K18<br>226 | prmD; propane monoxygenase coupling protein                            |
| SOX sulfur-oxidation system    | K22<br>622 | soxD; S-disulfanyl-L-cysteine oxidoreductase SoxD [EC:1.8.2.6]         |
| SOX sulfur-oxidation system    | K24<br>007 | soxD; cytochrome aa3-type oxidase subunit SoxD                         |
| SOX sulfur-oxidation system    | K24<br>008 | soxC; cytochrome aa3-type oxidase subunit III                          |
| SOX sulfur-oxidation system    | K24<br>009 | soxB; cytochrome aa3-type oxidase subunit I [EC:7.1.1.4]               |
| SOX sulfur-oxidation system    | K24<br>010 | soxA; cytochrome aa3-type oxidase subunit II [EC:7.1.1.4]              |



|                     |                             |        |                                                                                                           |
|---------------------|-----------------------------|--------|-----------------------------------------------------------------------------------------------------------|
|                     | SOX sulfur-oxidation system | K24011 | soxM; cytochrome aa3-type oxidase subunit I/III [EC:7.1.1.4]                                              |
| <b>Organotrophy</b> | ABC sugar transporters      | K02025 | ABC.MS.P; multiple sugar transport system permease protein                                                |
|                     | ABC sugar transporters      | K02026 | ABC.MS.P1; multiple sugar transport system permease protein                                               |
|                     | ABC sugar transporters      | K02027 | ABC.MS.S; multiple sugar transport system substrate-binding protein                                       |
|                     | ABC sugar transporters      | K02056 | ABC.SS.A; simple sugar transport system ATP-binding protein [EC:7.5.2.-]                                  |
|                     | ABC sugar transporters      | K02057 | ABC.SS.P; simple sugar transport system permease protein                                                  |
|                     | ABC sugar transporters      | K02058 | ABC.SS.S; simple sugar transport system substrate-binding protein                                         |
|                     | PTS sugar importers         | K02777 | crr; sugar PTS system EIIA component [EC:2.7.1.-]                                                         |
|                     | Amino acid transporter      | K03293 | TC.AAT; amino acid transporter, AAT family                                                                |
|                     | Peptide transporter         | K03305 | TC.POT; proton-dependent oligopeptide transporter, POT family                                             |
|                     | Amino acid transporter      | K03311 | TC.LIVCS; branched-chain amino acid:cation transporter, LIVCS family                                      |
|                     | Carboxylate transporters    | K03326 | TC.DCUC, dcuC, dcuD; C4-dicarboxylate transporter, DcuC family                                            |
|                     | Amino acid transporter      | K03450 | SLC7A; solute carrier family 7 (L-type amino acid transporter), other                                     |
|                     | Glycosyl hydrolases         | K04844 | ycjT; hypothetical glycosyl hydrolase [EC:3.2.1.-]                                                        |
|                     | Amino acid transporter      | K05048 | SLC6A15S; solute carrier family 6 (neurotransmitter transporter, amino acid/orphan) member 15/16/17/18/20 |
|                     | Amino acid transporter      | K05615 | SLC1A4, SATT; solute carrier family 1 (neutral amino acid transporter), member 4                          |
|                     | Amino acid transporter      | K05616 | SLC1A5; solute carrier family 1 (neutral amino acid transporter), member 5                                |
|                     | Amino acid transporter      | K07084 | yuiF; putative amino acid transporter                                                                     |
|                     | Carboxylate transporters    | K07791 | dcuA; anaerobic C4-dicarboxylate transporter DcuA                                                         |
|                     | Carboxylate transporters    | K07792 | dcuB; anaerobic C4-dicarboxylate transporter DcuB                                                         |
|                     | ABC sugar transporters      | K10546 | ABC.GGU.S, chvE; putative multiple sugar transport system substrate-binding protein                       |
|                     | ABC sugar transporters      | K10547 | ABC.GGU.P, gguB; putative multiple sugar transport system permease protein                                |
|                     | ABC sugar transporters      | K10548 | ABC.GGU.A, gguA; putative multiple sugar transport system ATP-binding protein [EC:7.5.2.-]                |
|                     | Carboxylate transporters    | K11689 | dctQ; C4-dicarboxylate transporter, DctQ subunit                                                          |
|                     | Carboxylate transporters    | K11690 | dctM; C4-dicarboxylate transporter, DctM subunit                                                          |
|                     | Amino acid transporter      | K13576 | SLC38A3, SNAT3; solute carrier family 38 (sodium-coupled neutral amino acid transporter), member 3        |

|                          |            |                                                                                                          |
|--------------------------|------------|----------------------------------------------------------------------------------------------------------|
| Carboxylate transporters | K13<br>577 | SLC25A10, DIC; solute carrier family 25 (mitochondrial dicarboxylate transporter), member 10             |
| Amino acid transporter   | K13<br>780 | SLC7A5, LAT1; solute carrier family 7 (L-type amino acid transporter), member 5                          |
| Amino acid transporter   | K13<br>781 | SLC7A8, LAT2; solute carrier family 7 (L-type amino acid transporter), member 8                          |
| Amino acid transporter   | K13<br>782 | SLC7A10, ASC1; solute carrier family 7 (L-type amino acid transporter), member 10                        |
| Amino acid transporter   | K13<br>863 | SLC7A1, ATRC1; solute carrier family 7 (cationic amino acid transporter), member 1                       |
| Amino acid transporter   | K13<br>864 | SLC7A2, ATRC2; solute carrier family 7 (cationic amino acid transporter), member 2                       |
| Amino acid transporter   | K13<br>865 | SLC7A3, ATRC3; solute carrier family 7 (cationic amino acid transporter), member 3                       |
| Amino acid transporter   | K13<br>866 | SLC7A4; solute carrier family 7 (cationic amino acid transporter), member 4                              |
| Amino acid transporter   | K13<br>867 | SLC7A7; solute carrier family 7 (L-type amino acid transporter), member 7                                |
| Amino acid transporter   | K13<br>868 | SLC7A9, BAT1; solute carrier family 7 (L-type amino acid transporter), member 9                          |
| Amino acid transporter   | K13<br>869 | SLC7A11; solute carrier family 7 (L-type amino acid transporter), member 11                              |
| Amino acid transporter   | K13<br>870 | SLC7A13, AGT1; solute carrier family 7 (L-type amino acid transporter), member 13                        |
| Amino acid transporter   | K13<br>871 | SLC7A14; solute carrier family 7 (cationic amino acid transporter), member 14                            |
| Amino acid transporter   | K13<br>872 | SLC7A6; solute carrier family 7 (L-type amino acid transporter), member 6                                |
| Peptide transporter      | K14<br>206 | SLC15A1, PEPT1; solute carrier family 15 (oligopeptide transporter), member 1                            |
| Amino acid transporter   | K14<br>207 | SLC38A2, SNAT2; solute carrier family 38 (sodium-coupled neutral amino acid transporter), member 2       |
| Amino acid transporter   | K14<br>209 | SLC36A, PAT; solute carrier family 36 (proton-coupled amino acid transporter)                            |
| Amino acid transporter   | K14<br>210 | SLC3A1, RBAT; solute carrier family 3 (neutral and basic amino acid transporter), member 1               |
| Carboxylate transporters | K14<br>388 | SLC5A8_12, SMCT; solute carrier family 5 (sodium-coupled monocarboxylate transporter), member 8/12       |
| Carboxylate transporters | K14<br>445 | SLC13A2_3_5; solute carrier family 13 (sodium-dependent dicarboxylate transporter), member 2/3/5         |
| Peptide transporter      | K14<br>637 | SLC15A2, PEPT2; solute carrier family 15 (oligopeptide transporter), member 2                            |
| Peptide transporter      | K14<br>638 | SLC15A3_4, PHT; solute carrier family 15 (peptide/histidine transporter), member 3/4                     |
| Amino acid transporter   | K14<br>990 | SLC38A1, SNAT1, GLNT; solute carrier family 38 (sodium-coupled neutral amino acid transporter), member 1 |
| Amino acid transporter   | K14<br>991 | SLC38A4, SNAT4; solute carrier family 38 (sodium-coupled neutral amino acid transporter), member 4       |
| Amino acid transporter   | K14<br>992 | SLC38A5, SNAT5; solute carrier family 38 (sodium-coupled neutral amino acid transporter), member 5       |
| Amino acid transporter   | K14<br>993 | SLC38A6, SNAT6; solute carrier family 38 (sodium-coupled neutral amino acid transporter), member 6       |
| Amino acid transporter   | K14        | SLC38A7_8; solute carrier family 38 (sodium-coupled                                                      |

|                     |                          |                                                  |                                                                                                   |
|---------------------|--------------------------|--------------------------------------------------|---------------------------------------------------------------------------------------------------|
|                     | transporter              | 994                                              | neutral amino acid transporter), member 7/8                                                       |
|                     | Amino acid transporter   | K14 995                                          | SLC38A9; solute carrier family 38 (sodium-coupled neutral amino acid transporter), member 9       |
|                     | Amino acid transporter   | K14 996                                          | SLC38A10; solute carrier family 38 (sodium-coupled neutral amino acid transporter), member 10     |
|                     | Amino acid transporter   | K14 997                                          | SLC38A11; solute carrier family 38 (sodium-coupled neutral amino acid transporter), member 11     |
|                     | Amino acid transporter   | K15 015                                          | SLC32A, VGAT; solute carrier family 32 (vesicular inhibitory amino acid transporter)              |
|                     | Carboxylate transporters | K15 110                                          | SLC25A21, ODC; solute carrier family 25 (mitochondrial 2-oxodicarboxylate transporter), member 21 |
|                     | Amino acid transporter   | K16 261                                          | YAT; yeast amino acid transporter                                                                 |
|                     | Amino acid transporter   | K16 263                                          | yjeH; amino acid efflux transporter                                                               |
|                     | Peptide transporter      | K17 938                                          | sbmA, bacA; peptide/bleomycin uptake transporter                                                  |
| <b>Photothrophy</b> | RuBisCO                  | K01 601                                          | rbcL; ribulose-bisphosphate carboxylase large chain [EC:4.1.1.39]                                 |
|                     | Chlorophyll synthesis    | K01 669                                          | phrB; deoxyribodipyrimidine photo-lyase [EC:4.1.99.3]                                             |
|                     | Chlorophyll synthesis    | K02 689                                          | psaA; photosystem I P700 chlorophyll a apoprotein A1                                              |
|                     | Chlorophyll synthesis    | K02 690                                          | psaB; photosystem I P700 chlorophyll a apoprotein A2                                              |
|                     | Chlorophyll synthesis    | K02 691                                          | psaC; photosystem I subunit VII                                                                   |
|                     | Chlorophyll synthesis    | K02 692                                          | psaD; photosystem I subunit II                                                                    |
|                     | Chlorophyll synthesis    | K02 693                                          | psaE; photosystem I subunit IV                                                                    |
|                     | Chlorophyll synthesis    | K02 694                                          | psaF; photosystem I subunit III                                                                   |
|                     | Chlorophyll synthesis    | K02 695                                          | psaH; photosystem I subunit VI                                                                    |
|                     | Chlorophyll synthesis    | K02 696                                          | psaI; photosystem I subunit VIII                                                                  |
|                     | Chlorophyll synthesis    | K02 697                                          | psaJ; photosystem I subunit IX                                                                    |
|                     | Chlorophyll synthesis    | K02 698                                          | psaK; photosystem I subunit X                                                                     |
|                     | Chlorophyll synthesis    | K02 699                                          | psaL; photosystem I subunit XI                                                                    |
|                     | Chlorophyll synthesis    | K02 700                                          | psaM; photosystem I subunit XII                                                                   |
|                     | Chlorophyll synthesis    | K02 701                                          | psaN; photosystem I subunit PsaN                                                                  |
|                     | Chlorophyll synthesis    | K02 702                                          | psaX; photosystem I 4.8kDa protein                                                                |
|                     | Chlorophyll synthesis    | K02 703                                          | psbA; photosystem II P680 reaction center D1 protein [EC:1.10.3.9]                                |
| Chlorophyll         | K02                      | psbB; photosystem II CP47 chlorophyll apoprotein |                                                                                                   |

|  |                       |            |                                                                        |
|--|-----------------------|------------|------------------------------------------------------------------------|
|  | synthesis             | 704        |                                                                        |
|  | Chlorophyll synthesis | K02<br>705 | psbC; photosystem II CP43 chlorophyll apoprotein                       |
|  | Chlorophyll synthesis | K02<br>706 | psbD; photosystem II P680 reaction center D2 protein [EC:1.10.3.9]     |
|  | Chlorophyll synthesis | K02<br>707 | psbE; photosystem II cytochrome b559 subunit alpha                     |
|  | Chlorophyll synthesis | K02<br>708 | psbF; photosystem II cytochrome b559 subunit beta                      |
|  | Chlorophyll synthesis | K02<br>709 | psbH; photosystem II PsbH protein                                      |
|  | Chlorophyll synthesis | K02<br>710 | psbI; photosystem II PsbI protein                                      |
|  | Chlorophyll synthesis | K02<br>711 | psbJ; photosystem II PsbJ protein                                      |
|  | Chlorophyll synthesis | K02<br>712 | psbK; photosystem II PsbK protein                                      |
|  | Chlorophyll synthesis | K02<br>713 | psbL; photosystem II PsbL protein                                      |
|  | Chlorophyll synthesis | K02<br>714 | psbM; photosystem II PsbM protein                                      |
|  | Chlorophyll synthesis | K02<br>716 | psbO; photosystem II oxygen-evolving enhancer protein 1                |
|  | Chlorophyll synthesis | K02<br>717 | psbP; photosystem II oxygen-evolving enhancer protein 2                |
|  | Chlorophyll synthesis | K02<br>718 | psbT; photosystem II PsbT protein                                      |
|  | Chlorophyll synthesis | K02<br>719 | psbU; photosystem II PsbU protein                                      |
|  | Chlorophyll synthesis | K02<br>720 | psbV; photosystem II cytochrome c550                                   |
|  | Chlorophyll synthesis | K02<br>721 | psbW; photosystem II PsbW protein                                      |
|  | Chlorophyll synthesis | K02<br>722 | psbX; photosystem II PsbX protein                                      |
|  | Chlorophyll synthesis | K02<br>723 | psbY; photosystem II PsbY protein                                      |
|  | Chlorophyll synthesis | K02<br>724 | psbZ; photosystem II PsbZ protein                                      |
|  | Chlorophyll synthesis | K03<br>157 | LTB, TNFC; lymphotoxin beta (TNF superfamily, member 3)                |
|  | Chlorophyll synthesis | K03<br>159 | TNFRSF3, LTBR; lymphotoxin beta receptor TNFR superfamily member 3     |
|  | Chlorophyll synthesis | K03<br>541 | psbR; photosystem II 10kDa protein                                     |
|  | Chlorophyll synthesis | K03<br>542 | psbS; photosystem II 22kDa protein                                     |
|  | Chlorophyll synthesis | K03<br>716 | splB; spore photoproduct lyase [EC:4.1.99.14]                          |
|  | Chlorophyll synthesis | K05<br>468 | LTA, TNFB; lymphotoxin alpha (TNF superfamily, member 1)               |
|  | Chlorophyll synthesis | K06<br>315 | splA; transcriptional regulator of the spore photoproduct lyase operon |

|                              |                       |        |                                                             |
|------------------------------|-----------------------|--------|-------------------------------------------------------------|
|                              | Chlorophyll synthesis | K06876 | K06876; deoxyribodipyrimidine photolyase-related protein    |
|                              | Chlorophyll synthesis | K08901 | psbQ; photosystem II oxygen-evolving enhancer protein 3     |
|                              | Chlorophyll synthesis | K08902 | psb27; photosystem II Psb27 protein                         |
|                              | Chlorophyll synthesis | K08903 | psb28; photosystem II 13kDa protein                         |
|                              | Chlorophyll synthesis | K08904 | psb28-2; photosystem II Psb28-2 protein                     |
|                              | Chlorophyll synthesis | K08905 | psaG; photosystem I subunit V                               |
|                              | Chlorophyll synthesis | K08928 | pufL; photosynthetic reaction center L subunit              |
|                              | Chlorophyll synthesis | K08929 | pufM; photosynthetic reaction center M subunit              |
|                              | Chlorophyll synthesis | K08940 | pscA; photosystem P840 reaction center large subunit        |
|                              | Chlorophyll synthesis | K08941 | pscB; photosystem P840 reaction center iron-sulfur protein  |
|                              | Chlorophyll synthesis | K08942 | pscC; photosystem P840 reaction center cytochrome c551      |
|                              | Chlorophyll synthesis | K08943 | pscD; photosystem P840 reaction center protein PscD         |
|                              | Chlorophyll synthesis | K11524 | pixI; positive phototaxis protein PixI                      |
|                              | Chlorophyll synthesis | K13991 | puhA; photosynthetic reaction center H subunit              |
|                              | Chlorophyll synthesis | K13992 | pufC; photosynthetic reaction center cytochrome c subunit   |
|                              | Chlorophyll synthesis | K13994 | pufX; photosynthetic reaction center PufX protein           |
|                              | Chlorophyll synthesis | K14332 | psaO; photosystem I subunit PsaO                            |
|                              | Chlorophyll synthesis | K19016 | IMPG1, SPACR; interphotoreceptor matrix proteoglycan 1      |
|                              | Chlorophyll synthesis | K19017 | IMPG2, SPACRCAN; interphotoreceptor matrix proteoglycan 2   |
|                              | Chlorophyll synthesis | K20715 | PHOT; phototropin [EC:2.7.11.1]                             |
|                              | Chlorophyll synthesis | K22464 | FAP; fatty acid photodecarboxylase [EC:4.1.1.106]           |
|                              | Chlorophyll synthesis | K22619 | Aequorin; calcium-regulated photoprotein [EC:1.13.12.24]    |
|                              | Chlorophyll synthesis | K24165 | PCARE; photoreceptor cilium actin regulator                 |
| <b>ROS-damage prevention</b> | Cytochrome C oxidase  | K00404 | ccoN; cytochrome c oxidase cbb3-type subunit I [EC:7.1.1.9] |
|                              | Cytochrome C oxidase  | K00405 | ccoO; cytochrome c oxidase cbb3-type subunit II             |
|                              | Cytochrome C oxidase  | K00406 | ccoP; cytochrome c oxidase cbb3-type subunit III            |
|                              | Cytochrome C oxidase  | K00407 | ccoQ; cytochrome c oxidase cbb3-type subunit IV             |

|                                 |        |                                                                |
|---------------------------------|--------|----------------------------------------------------------------|
| Cytochrome bd ubiquinol oxidase | K00424 | cydX; cytochrome bd-I ubiquinol oxidase subunit X [EC:7.1.1.7] |
| Cytochrome C oxidase            | K00424 | cydX; cytochrome bd-I ubiquinol oxidase subunit X [EC:7.1.1.7] |
| Cytochrome bd ubiquinol oxidase | K00425 | cydA; cytochrome bd ubiquinol oxidase subunit I [EC:7.1.1.7]   |
| Cytochrome C oxidase            | K00425 | cydA; cytochrome bd ubiquinol oxidase subunit I [EC:7.1.1.7]   |
| Cytochrome bd ubiquinol oxidase | K00426 | cydB; cytochrome bd ubiquinol oxidase subunit II [EC:7.1.1.7]  |
| Cytochrome C oxidase            | K00426 | cydB; cytochrome bd ubiquinol oxidase subunit II [EC:7.1.1.7]  |
| Cytochrome C oxidase            | K00428 | E1.11.1.5; cytochrome c peroxidase [EC:1.11.1.5]               |
| Cytochrome C oxidase            | K02256 | COX1; cytochrome c oxidase subunit 1 [EC:7.1.1.9]              |
| Cytochrome C oxidase            | K02258 | COX11, ctaG; cytochrome c oxidase assembly protein subunit 11  |
| Cytochrome C oxidase            | K02259 | COX15, ctaA; cytochrome c oxidase assembly protein subunit 15  |
| Cytochrome C oxidase            | K02260 | COX17; cytochrome c oxidase assembly protein subunit 17        |
| Cytochrome C oxidase            | K02261 | COX2; cytochrome c oxidase subunit 2                           |
| Cytochrome C oxidase            | K02262 | COX3; cytochrome c oxidase subunit 3                           |
| Cytochrome C oxidase            | K02263 | COX4; cytochrome c oxidase subunit 4                           |
| Cytochrome C oxidase            | K02264 | COX5A; cytochrome c oxidase subunit 5a                         |
| Cytochrome C oxidase            | K02265 | COX5B; cytochrome c oxidase subunit 5b                         |
| Cytochrome C oxidase            | K02266 | COX6A; cytochrome c oxidase subunit 6a                         |
| Cytochrome C oxidase            | K02267 | COX6B; cytochrome c oxidase subunit 6b                         |
| Cytochrome C oxidase            | K02268 | COX6C; cytochrome c oxidase subunit 6c                         |
| Cytochrome C oxidase            | K02269 | COX7; cytochrome c oxidase subunit 7                           |
| Cytochrome C oxidase            | K02270 | COX7A; cytochrome c oxidase subunit 7a                         |
| Cytochrome C oxidase            | K02271 | COX7B; cytochrome c oxidase subunit 7b                         |
| Cytochrome C oxidase            | K02272 | COX7C; cytochrome c oxidase subunit 7c                         |
| Cytochrome C oxidase            | K02273 | COX8; cytochrome c oxidase subunit 8                           |
| Cytochrome C oxidase            | K02274 | coxA, ctaD; cytochrome c oxidase subunit I [EC:7.1.1.9]        |
| Cytochrome C oxidase            | K02    | coxB, ctaC; cytochrome c oxidase subunit II                    |

|  |                           |            |                                                                      |
|--|---------------------------|------------|----------------------------------------------------------------------|
|  | oxidase                   | 275        | [EC:7.1.1.9]                                                         |
|  | Cytochrome C oxidase      | K02<br>276 | coxC, ctaE; cytochrome c oxidase subunit III [EC:7.1.1.9]            |
|  | Cytochrome C oxidase      | K02<br>277 | coxD, ctaF; cytochrome c oxidase subunit IV [EC:7.1.1.9]             |
|  | Cytochrome C oxidase      | K02<br>297 | cyoA; cytochrome o ubiquinol oxidase subunit II [EC:7.1.1.3]         |
|  | Cytochrome C oxidase      | K02<br>298 | cyoB; cytochrome o ubiquinol oxidase subunit I [EC:7.1.1.3]          |
|  | Cytochrome C oxidase      | K02<br>299 | cyoC; cytochrome o ubiquinol oxidase subunit III                     |
|  | Cytochrome C oxidase      | K02<br>300 | cyoD; cytochrome o ubiquinol oxidase subunit IV                      |
|  | Cytochrome C oxidase      | K02<br>826 | qoxA; cytochrome aa3-600 menaquinol oxidase subunit II [EC:7.1.1.5]  |
|  | Cytochrome C oxidase      | K02<br>827 | qoxB; cytochrome aa3-600 menaquinol oxidase subunit I [EC:7.1.1.5]   |
|  | Cytochrome C oxidase      | K02<br>828 | qoxC; cytochrome aa3-600 menaquinol oxidase subunit III [EC:7.1.1.5] |
|  | Cytochrome C oxidase      | K02<br>829 | qoxD; cytochrome aa3-600 menaquinol oxidase subunit IV [EC:7.1.1.5]  |
|  | Mn <sup>2+</sup> catalase | K07<br>217 | K07217; Mn-containing catalase                                       |
|  | Cytochrome C oxidase      | K15<br>408 | coxAC; cytochrome c oxidase subunit I+III [EC:7.1.1.9]               |
|  | Cytochrome C oxidase      | K15<br>862 | ccoNO; cytochrome c oxidase cbb3-type subunit I/II [EC:7.1.1.9]      |
|  | Cytochrome C oxidase      | K18<br>173 | COA1; cytochrome c oxidase assembly factor 1                         |
|  | Cytochrome C oxidase      | K18<br>174 | COA2; cytochrome c oxidase assembly factor 2                         |
|  | Cytochrome C oxidase      | K18<br>175 | CCDC56, COA3; cytochrome c oxidase assembly factor 3, animal type    |
|  | Cytochrome C oxidase      | K18<br>176 | COA3; cytochrome c oxidase assembly factor 3, fungi type             |
|  | Cytochrome C oxidase      | K18<br>177 | COA4; cytochrome c oxidase assembly factor 4                         |
|  | Cytochrome C oxidase      | K18<br>178 | COA5, PET191; cytochrome c oxidase assembly factor 5                 |
|  | Cytochrome C oxidase      | K18<br>179 | COA6; cytochrome c oxidase assembly factor 6                         |
|  | Cytochrome C oxidase      | K18<br>180 | COA7, SELRC1, RESA1; cytochrome c oxidase assembly factor 7          |
|  | Cytochrome C oxidase      | K18<br>181 | COX14; cytochrome c oxidase assembly factor 14                       |
|  | Cytochrome C oxidase      | K18<br>182 | COX16; cytochrome c oxidase assembly protein subunit 16              |
|  | Cytochrome C oxidase      | K18<br>183 | COX19; cytochrome c oxidase assembly protein subunit 19              |
|  | Cytochrome C oxidase      | K18<br>184 | COX20; cytochrome c oxidase assembly protein subunit 20              |
|  | Cytochrome C oxidase      | K18<br>185 | COX23; cytochrome c oxidase assembly protein subunit 23              |

|                              |                                 |                                   |                                                                                                      |
|------------------------------|---------------------------------|-----------------------------------|------------------------------------------------------------------------------------------------------|
|                              | Cytochrome C oxidase            | K18189                            | TACO1; translational activator of cytochrome c oxidase 1                                             |
|                              | Cytochrome bd ubiquinol oxidase | K22501                            | appX; cytochrome bd-II ubiquinol oxidase subunit AppX [EC:7.1.1.7]                                   |
|                              | Cytochrome C oxidase            | K22501                            | appX; cytochrome bd-II ubiquinol oxidase subunit AppX [EC:7.1.1.7]                                   |
|                              | Cytochrome C oxidase            | K24007                            | soxD; cytochrome aa3-type oxidase subunit SoxD                                                       |
|                              | Cytochrome C oxidase            | K24008                            | soxC; cytochrome aa3-type oxidase subunit III                                                        |
|                              | Cytochrome C oxidase            | K24009                            | soxB; cytochrome aa3-type oxidase subunit I [EC:7.1.1.4]                                             |
|                              | Cytochrome C oxidase            | K24010                            | soxA; cytochrome aa3-type oxidase subunit II [EC:7.1.1.4]                                            |
|                              | Cytochrome C oxidase            | K24011                            | soxM; cytochrome aa3-type oxidase subunit I/III [EC:7.1.1.4]                                         |
| <b>Sporulation</b>           | Glycogen synthesis              | K00693                            | GYS; glycogen synthase [EC:2.4.1.11]                                                                 |
|                              | Sporulation (Actinobacteria)    | K02490                            | spo0F; two-component system, response regulator, stage 0 sporulation protein F                       |
|                              | Sporulation (Actinobacteria)    | K02491                            | kinA; two-component system, sporulation sensor kinase A [EC:2.7.13.3]                                |
|                              | Glycogen synthesis              | K03083                            | GSK3B; glycogen synthase kinase 3 beta [EC:2.7.11.26]                                                |
|                              | Sporulation (Actinobacteria)    | K03091                            | sigH; RNA polymerase sporulation-specific sigma factor                                               |
|                              | Sporulation (Actinobacteria)    | K04769                            | spoVT; AbrB family transcriptional regulator, stage V sporulation protein T                          |
|                              | Sporulation (Actinobacteria)    | K06283                            | spoIIID; putative DeoR family transcriptional regulator, stage III sporulation protein D             |
|                              | Sporulation (Actinobacteria)    | K06348                            | kapD; sporulation inhibitor KapD                                                                     |
|                              | Sporulation (Actinobacteria)    | K06359                            | rapA, spo0L; response regulator aspartate phosphatase A (stage 0 sporulation protein L) [EC:3.1.-.-] |
|                              | Sporulation (Actinobacteria)    | K06371                            | sda; developmental checkpoint coupling sporulation initiation to replication initiation              |
|                              | Sporulation (Actinobacteria)    | K06375                            | spo0B; stage 0 sporulation protein B (sporulation initiation phosphotransferase) [EC:2.7.-.-]        |
|                              | Sporulation (Actinobacteria)    | K06376                            | spo0E; stage 0 sporulation regulatory protein                                                        |
| Sporulation (Actinobacteria) | K06377                          | spo0M; sporulation-barren protein |                                                                                                      |



|                              |        |                                                                                                          |
|------------------------------|--------|----------------------------------------------------------------------------------------------------------|
| Sporulation (Actinobacteria) | K06378 | spoIIAA; stage II sporulation protein AA (anti-sigma F factor antagonist)                                |
| Sporulation (Actinobacteria) | K06379 | spoIIAB; stage II sporulation protein AB (anti-sigma F factor) [EC:2.7.11.1]                             |
| Sporulation (Actinobacteria) | K06380 | spoIIB; stage II sporulation protein B                                                                   |
| Sporulation (Actinobacteria) | K06381 | spoIID; stage II sporulation protein D                                                                   |
| Sporulation (Actinobacteria) | K06382 | spoIIE; stage II sporulation protein E [EC:3.1.3.16]                                                     |
| Sporulation (Actinobacteria) | K06383 | spoIIGA; stage II sporulation protein GA (sporulation sigma-E factor processing peptidase) [EC:3.4.23.-] |
| Sporulation (Actinobacteria) | K06384 | spoIIM; stage II sporulation protein M                                                                   |
| Sporulation (Actinobacteria) | K06385 | spoIIP; stage II sporulation protein P                                                                   |
| Sporulation (Actinobacteria) | K06386 | spoIIQ; stage II sporulation protein Q                                                                   |
| Sporulation (Actinobacteria) | K06387 | spoIIR; stage II sporulation protein R                                                                   |
| Sporulation (Actinobacteria) | K06388 | spoIISA; stage II sporulation protein SA                                                                 |
| Sporulation (Actinobacteria) | K06389 | spoIISB; stage II sporulation protein SB                                                                 |
| Sporulation (Actinobacteria) | K06390 | spoIIIAA; stage III sporulation protein AA                                                               |
| Sporulation (Actinobacteria) | K06391 | spoIIIAB; stage III sporulation protein AB                                                               |
| Sporulation (Actinobacteria) | K06392 | spoIIIAC; stage III sporulation protein AC                                                               |
| Sporulation (Actinobacteria) | K06393 | spoIIIID; stage III sporulation protein AD                                                               |
| Sporulation (Actinobacteria) | K06394 | spoIIIAE; stage III sporulation protein AE                                                               |
| Sporulation (Actinobacteria) | K06395 | spoIIIAF; stage III sporulation protein AF                                                               |

|                              |        |                                                        |
|------------------------------|--------|--------------------------------------------------------|
| Sporulation (Actinobacteria) | K06396 | spoIIIAG; stage III sporulation protein AG             |
| Sporulation (Actinobacteria) | K06397 | spoIIIAH; stage III sporulation protein AH             |
| Sporulation (Actinobacteria) | K06398 | spoIVA; stage IV sporulation protein A                 |
| Sporulation (Actinobacteria) | K06399 | spoIVB; stage IV sporulation protein B [EC:3.4.21.116] |
| Sporulation (Actinobacteria) | K06401 | spoIVFA; stage IV sporulation protein FA               |
| Sporulation (Actinobacteria) | K06402 | spoIVFB; stage IV sporulation protein FB [EC:3.4.24.-] |
| Sporulation (Actinobacteria) | K06403 | spoVAA; stage V sporulation protein AA                 |
| Sporulation (Actinobacteria) | K06404 | spoVAB; stage V sporulation protein AB                 |
| Sporulation (Actinobacteria) | K06405 | spoVAC; stage V sporulation protein AC                 |
| Sporulation (Actinobacteria) | K06406 | spoVAD; stage V sporulation protein AD                 |
| Sporulation (Actinobacteria) | K06407 | spoVAE; stage V sporulation protein AE                 |
| Sporulation (Actinobacteria) | K06408 | spoVAF; stage V sporulation protein AF                 |
| Sporulation (Actinobacteria) | K06409 | spoVB; stage V sporulation protein B                   |
| Sporulation (Actinobacteria) | K06412 | spoVG; stage V sporulation protein G                   |
| Sporulation (Actinobacteria) | K06413 | spoVK; stage V sporulation protein K                   |
| Sporulation (Actinobacteria) | K06414 | spoVM; stage V sporulation protein M                   |
| Sporulation (Actinobacteria) | K06415 | spoVR; stage V sporulation protein R                   |
| Sporulation (Actinobacteria) | K06416 | spoVS; stage V sporulation protein S                   |

|                              |        |                                                                                        |
|------------------------------|--------|----------------------------------------------------------------------------------------|
| Sporulation (Actinobacteria) | K06417 | spoVID; stage VI sporulation protein D                                                 |
| Sporulation (Actinobacteria) | K06437 | yknT; sigma-E barrenled sporulation protein                                            |
| Sporulation (Actinobacteria) | K06438 | yqfD; similar to stage IV sporulation protein                                          |
| Sporulation (Actinobacteria) | K07697 | kinB; two-component system, sporulation sensor kinase B [EC:2.7.13.3]                  |
| Sporulation (Actinobacteria) | K07698 | kinC; two-component system, sporulation sensor kinase C [EC:2.7.13.3]                  |
| Sporulation (Actinobacteria) | K07699 | spo0A; two-component system, response regulator, stage 0 sporulation protein A         |
| Sporulation (Actinobacteria) | K08293 | SMK1; sporulation-specific mitogen-activated protein kinase SMK1 [EC:2.7.11.24]        |
| Sporulation (Actinobacteria) | K08384 | spoVD; stage V sporulation protein D (sporulation-specific penicillin-binding protein) |
| Glycogen synthesis           | K08822 | GSK3A; glycogen synthase kinase 3 alpha [EC:2.7.11.26]                                 |
| Sporulation (Actinobacteria) | K12576 | SPO12; sporulation-specific protein 12                                                 |
| Sporulation (Actinobacteria) | K12771 | SPS1; sporulation-specific protein 1 [EC:2.7.11.1]                                     |
| Sporulation (Actinobacteria) | K12772 | SPS4; sporulation-specific protein 4                                                   |
| Sporulation (Actinobacteria) | K12773 | SPR3; sporulation-regulated protein 3                                                  |
| Sporulation (Actinobacteria) | K12783 | SSP1; sporulation-specific protein 1                                                   |
| Sporulation (Actinobacteria) | K13532 | kinD; two-component system, sporulation sensor kinase D [EC:2.7.13.3]                  |
| Sporulation (Actinobacteria) | K13533 | kinE; two-component system, sporulation sensor kinase E [EC:2.7.13.3]                  |
| Glycogen synthesis           | K16150 | K16150; glycogen synthase [EC:2.4.1.11]                                                |
| Exopolysaccharide synthesis  | K16566 | exoY; exopolysaccharide production protein ExoY                                        |
| Exopolysaccharide synthesis  | K16567 | exoQ; exopolysaccharide production protein ExoQ                                        |
| Exopolysaccharide synthesis  | K16    | exoZ; exopolysaccharide production protein ExoZ                                        |

|  |                                 |            |                                         |
|--|---------------------------------|------------|-----------------------------------------|
|  | ride synthesis                  | 568        |                                         |
|  | Sporulation<br>(Actinobacteria) | K16<br>947 | SPR28; sporulation-regulated protein 28 |
|  | Glycogen<br>synthesis           | K20<br>812 | glgA; glycogen synthase [EC:2.4.1.242]  |

537  
538

539 Table A.4. Chlorophyll concentrations and water content values in the biocrust at each  
540 sampling point and site.

| <b>Time</b> | <b>Chlorophyll concentration (mg chla/ g soil)</b> | <b>Water content (%)</b> | <b>Total organic carbon (%)</b> | <b>Total nitrogen (%)</b> |
|-------------|----------------------------------------------------|--------------------------|---------------------------------|---------------------------|
| T[0]        | 7.670                                              | 1.850                    | 4.225                           | 0.112                     |
| T[0]        | 8.553                                              | 2.670                    | 4.107                           | 0.114                     |
| T[0]        | 6.835                                              | 2.290                    | 4.188                           | 0.107                     |
| T[R]        | 10.145                                             | 13.610                   | 2.999                           | 0.104                     |
| T[R]        | 16.144                                             | 16.930                   | 3.898                           | 0.104                     |
| T[R]        | 15.703                                             | 16.550                   | 3.787                           | 0.109                     |
| T[R]        | 12.745                                             | 16.340                   | 3.967                           | 0.104                     |
| T[R]        | 14.160                                             | 17.520                   | 3.972                           | 0.071                     |
| T[1]        | 10.519                                             | 5.300                    | 3.269                           | 0.065                     |
| T[1]        | 16.003                                             | 5.620                    | 3.238                           | 0.065                     |
| T[1]        | 16.877                                             | 7.140                    | 3.955                           | 0.085                     |
| T[1]        | 15.262                                             | 6.220                    | 3.964                           | 0.073                     |
| T[1]        | 14.177                                             | 6.830                    | 3.948                           | 0.098                     |
| T[2]        | 10.092                                             | 3.920                    | 3.879                           | 0.087                     |
| T[2]        | 11.829                                             | 4.490                    | 4.031                           | 0.082                     |
| T[2]        | 11.840                                             | 4.510                    | 4.244                           | 0.100                     |
| T[2]        | 13.045                                             | 5.070                    | 4.134                           | 0.115                     |
| T[2]        | 12.975                                             | 6.900                    | 4.050                           | 0.095                     |
| T[3]        | 9.881                                              | 2.860                    | 3.834                           | 0.092                     |
| T[3]        | 12.751                                             | 3.670                    | 3.709                           | 0.100                     |
| T[3]        | 9.314                                              | 3.710                    | 3.706                           | 0.076                     |
| T[3]        | 9.366                                              | 4.320                    | 4.511                           | 0.081                     |
| T[3]        | 14.520                                             | 3.780                    | 4.589                           | 0.093                     |

541  
542

543 Table A.5. Dunn tests p values for chlorophyll concentration (mg chla/g of soil), water  
544 content (%), total organic carbon content (%) and total nitrogen (%) in biocrust samples  
545 collected at the different sampling point. Bold numbers mark significant differences (<0.05).

| Comparison  | Chlorophyll       | Water content     | Total organic Carbon | Total Nitrogen |
|-------------|-------------------|-------------------|----------------------|----------------|
| T[0] - T[1] | <b>0.00538004</b> | 0.05699315        | 0.89                 | 0.169          |
| T[0] - T[2] | <b>0.02846706</b> | 0.35971877        | 0.64                 | 0.525          |
| T[1] - T[2] | 0.25895220        | <b>0.02620581</b> | 0.55                 | 0.448          |
| T[0] - T[3] | 0.17516547        | 0.20434975        | 0.75                 | 0.065          |
| T[1] - T[3] | 0.05299877        | <b>0.00804845</b> | 0.85                 | 0.611          |
| T[2] - T[3] | 0.16605599        | 0.32025932        | 0.43                 | 0.210          |
| T[0] - T[R] | <b>3.5589E-06</b> | 0.15725837        | 0.84                 | 0.723          |
| T[1] - T[R] | <b>0.02620581</b> | 0.28273460        | 0.95                 | 0.300          |
| T[2] - T[R] | <b>0.00485039</b> | 0.08612648        | 0.51                 | 0.776          |
| T[3] - T[R] | <b>0.00018814</b> | <b>0.03347764</b> | 0.90                 | 0.128          |

546

547 Table A.6. Relative abundance of the taxa in the biocrust community at each time point.

| Phylum              | Order               | Time Point  | Relative Abundance |
|---------------------|---------------------|-------------|--------------------|
| Actinobacteria      | Frankiales          | T[0]        | 0.022907633        |
|                     |                     | T[R]        | 0.03574372         |
|                     |                     | T[1]        | 0.012995761        |
|                     |                     | T[2]        | 0.032045929        |
|                     |                     | T[3]        | 0.02063487         |
|                     | IMCC26256           | T[0]        | 0.009681202        |
|                     |                     | T[R]        | 0.005259368        |
|                     |                     | T[1]        | 0.008388448        |
|                     |                     | T[2]        | 0.008617354        |
|                     |                     | T[3]        | 0.006227356        |
|                     | Micrococcales       | T[0]        | 0.385359194        |
|                     |                     | T[R]        | 0.009765818        |
|                     |                     | T[2]        | 0.008171044        |
|                     |                     | T[3]        | 0.00669884         |
|                     | Micromonosporales   | T[R]        | 0.013939918        |
|                     |                     | T[1]        | 0.005556665        |
|                     |                     | T[2]        | 0.007483088        |
|                     |                     | T[3]        | 0.007512356        |
|                     | Microtrichales      | T[1]        | 0.00532056         |
|                     |                     | T[2]        | 0.005352285        |
|                     | Propionibacteriales | T[R]        | 0.010647015        |
|                     |                     | T[1]        | 0.006196615        |
|                     |                     | T[2]        | 0.009500737        |
|                     | Pseudonocardiales   | T[3]        | 0.005302327        |
|                     |                     | T[R]        | 0.007935732        |
|                     |                     | T[2]        | 0.005403369        |
|                     | Rubrobacterales     | T[0]        | 0.015244484        |
|                     |                     | T[R]        | 0.075369688        |
|                     |                     | T[1]        | 0.088221276        |
|                     |                     | T[2]        | 0.103851434        |
| T[3]                |                     | 0.08049968  |                    |
| Solirubrobacterales | T[0]                | 0.076522403 |                    |
|                     | T[R]                | 0.039879122 |                    |
|                     | T[1]                | 0.043060268 |                    |
|                     | T[2]                | 0.045998142 |                    |
|                     | T[3]                | 0.031839496 |                    |
| Cyanobacteria       | Chloroplast         | T[0]        | 0.020862309        |
|                     |                     | T[R]        | 0.011650182        |
|                     |                     | T[1]        | 0.026512447        |
|                     |                     | T[2]        | 0.028141321        |
|                     |                     | T[3]        | 0.018079461        |
|                     | Cyanobacteriales    | T[0]        | 0.19073226         |
| Cyanobacteria       | Cyanobacteriales    | T[R]        | 0.389427243        |

|                 |                          |                   |             |             |
|-----------------|--------------------------|-------------------|-------------|-------------|
|                 |                          | T[1]              | 0.333676493 |             |
|                 |                          | T[2]              | 0.292463654 |             |
|                 |                          | T[3]              | 0.350595706 |             |
|                 | Unknown Oxyphotobacteria | T[R]              | 0.013481119 |             |
|                 |                          | T[1]              | 0.015453064 |             |
|                 |                          | T[2]              | 0.013590863 |             |
|                 |                          | T[3]              | 0.015066421 |             |
|                 | Thermosynechococcales    | T[0]              | 0.010799313 |             |
| Acidobacteriota | Bryobacterales           | T[R]              | 0.005153526 |             |
| Bacteroidota    | Chitinophagales          | T[0]              | 0.006236605 |             |
|                 |                          | T[R]              | 0.005163481 |             |
|                 |                          | T[2]              | 0.007262191 |             |
|                 | Cytophagales             | T[0]              | 0.009163053 |             |
|                 |                          | T[R]              | 0.096453172 |             |
|                 |                          | T[1]              | 0.11996715  |             |
|                 |                          | T[2]              | 0.079192234 |             |
|                 |                          | T[3]              | 0.090668802 |             |
| Chloroflexi     | Kallotenuales            | T[R]              | 0.00838268  |             |
|                 |                          | T[2]              | 0.01633687  |             |
|                 |                          | T[3]              | 0.008408777 |             |
|                 |                          | Thermomicrobiales | T[2]        | 0.005146914 |
| Gemmatimonadota | Gemmatimonadales         | T[R]              | 0.005436359 |             |
|                 |                          | T[2]              | 0.006908222 |             |
|                 | Longimicrobiales         | T[R]              | 0.016006999 |             |
|                 |                          | T[2]              | 0.005421611 |             |
| Myxococcota     | Haliangiales             | T[R]              | 0.005678943 |             |
|                 |                          | T[3]              | 0.006010924 |             |
|                 | Myxococcales             | T[R]              | 0.020299082 |             |
|                 |                          | T[1]              | 0.010755355 |             |
|                 |                          | T[2]              | 0.013671351 |             |
|                 |                          |                   | T[3]        | 0.014621574 |
|                 | Nannocystales            | T[R]              | 0.008809035 |             |
|                 |                          | T[1]              | 0.01090915  |             |
|                 |                          | T[2]              | 0.005558526 |             |
|                 |                          |                   | T[3]        | 0.006743362 |
|                 | Polyangiales             | T[R]              | 0.008294912 |             |
|                 |                          | T[1]              | 0.008084686 |             |
| T[2]            |                          | 0.005990088       |             |             |
|                 |                          | T[3]              | 0.006645987 |             |
| Proteobacteria  | Acetobacterales          | T[R]              | 0.014783181 |             |
|                 |                          | T[1]              | 0.012028303 |             |
|                 |                          | T[2]              | 0.016252769 |             |
|                 |                          | T[3]              | 0.016407297 |             |
|                 |                          | Azospirillales    | T[0]        | 0.030702093 |
|                 | Burkholderiales          | T[0]              | 0.056796051 |             |
| Proteobacteria  | Burkholderiales          | T[R]              | 0.012959379 |             |



|                   |                    |             |             |
|-------------------|--------------------|-------------|-------------|
|                   |                    | T[1]        | 0.010671657 |
|                   |                    | T[2]        | 0.013591631 |
|                   |                    | T[3]        | 0.012713217 |
|                   | Caulobacterales    | T[0]        | 0.012899179 |
|                   |                    | T[R]        | 0.022042144 |
|                   |                    | T[1]        | 0.034822507 |
|                   |                    | T[2]        | 0.020704156 |
|                   |                    | T[3]        | 0.024863575 |
|                   | Pseudomonadales    | T[0]        | 0.013867311 |
|                   | Rhizobiales        | T[0]        | 0.087344626 |
|                   |                    | T[R]        | 0.043724525 |
|                   |                    | T[1]        | 0.063099159 |
|                   |                    | T[2]        | 0.070129812 |
|                   |                    | T[3]        | 0.068004988 |
|                   | Rhodobacterales    | T[0]        | 0.00551081  |
|                   |                    | T[R]        | 0.016305263 |
|                   |                    | T[1]        | 0.016673137 |
|                   |                    | T[2]        | 0.021005185 |
|                   |                    | T[3]        | 0.016425317 |
|                   | Sphingomonadales   | T[0]        | 0.018796014 |
| T[R]              |                    | 0.038019558 |             |
| T[1]              |                    | 0.044013044 |             |
| T[2]              |                    | 0.044435076 |             |
| T[3]              |                    | 0.033523863 |             |
| Verrucomicrobiota | Chthoniobacterales | T[R]        | 0.012024879 |
|                   |                    | T[1]        | 0.066714297 |
|                   |                    | T[2]        | 0.044130375 |
|                   |                    | T[3]        | 0.094877543 |

548  
549  
550  
551

552 Table A.7. P-values of the Dunn tests between time points on the relative abundance of the  
553 actinobacterial and cyanobacterial orders. Bold numbers are significant (<0.05).

| Comparison  | Cyanobacteria   | Actinobacteria  |
|-------------|-----------------|-----------------|
| T[0] - T[1] | <b>6.13E-10</b> | <b>8.15E-13</b> |
| T[0] - T[2] | <b>5.13E-08</b> | <b>2.52E-14</b> |
| T[0] - T[3] | <b>5.98E-10</b> | <b>6.89E-11</b> |
| T[0] - T[R] | <b>6.52E-10</b> | <b>6.47E-14</b> |
| T[1] - T[3] | 0.498128567     | 0.228324880     |
| T[1] - T[2] | 0.191797281     | 0.294405229     |
| T[1] - T[R] | 0.495469243     | 0.345672443     |
| T[2] - T[R] | 0.194912395     | 0.442935801     |
| T[3] - T[R] | 0.493597980     | 0.126850627     |
| T[2] - T[3] | 0.190519550     | 0.099407424     |

554  
555

556 Table A.8. Abundance (in copy number (CN)) of each time points within each group of gene.

| Gene Group                 | Time points | Abundance |
|----------------------------|-------------|-----------|
| DNA conservation           | T[0]        | 20590     |
|                            | T[R]        | 91433     |
|                            | T[1]        | 92496     |
|                            | T[2]        | 78321     |
|                            | T[3]        | 81983     |
| DNA repair and degradation | T[0]        | 13579     |
|                            | T[R]        | 66132     |
|                            | T[1]        | 67048     |
|                            | T[2]        | 55948     |
|                            | T[3]        | 58457     |
| Light energy or sensing    | T[0]        | 85        |
|                            | T[R]        | 43        |
|                            | T[1]        | 59        |
|                            | T[2]        | 64        |
|                            | T[3]        | 17        |
| Lithotrophs                | T[0]        | 7554      |
|                            | T[R]        | 37972     |
|                            | T[1]        | 38632     |
|                            | T[2]        | 31341     |
|                            | T[3]        | 32758     |
| Nitrogen                   | T[0]        | 10027     |
|                            | T[R]        | 50708     |
|                            | T[1]        | 58068     |
|                            | T[2]        | 48225     |
|                            | T[3]        | 45638     |
| Organotrophs               | T[0]        | 60007     |
|                            | T[R]        | 108275    |
|                            | T[1]        | 111044    |
|                            | T[2]        | 88557     |
|                            | T[3]        | 89148     |
| Phototrophy                | T[0]        | 50301     |
|                            | T[R]        | 445432    |
|                            | T[1]        | 425819    |
|                            | T[2]        | 342188    |
|                            | T[3]        | 407532    |
| ROS-damage prevention      | T[0]        | 26126     |
|                            | T[R]        | 138367    |
|                            | T[1]        | 143726    |
|                            | T[2]        | 121507    |
|                            | T[3]        | 126677    |
| Sensing & motility         | T[0]        | 31075     |
|                            | T[R]        | 81947     |
|                            | T[1]        | 92070     |

|                                 |      |       |
|---------------------------------|------|-------|
| Sensing & motility              | T[2] | 90844 |
|                                 | T[3] | 74436 |
| Sporulation capsule & C-storage | T[0] | 7302  |
|                                 | T[R] | 48141 |
|                                 | T[1] | 48944 |
|                                 | T[2] | 38998 |
|                                 | T[3] | 42341 |

557

558 Table A.9. Chi-square values and p-values of the Dunn tests between time points done on the  
 559 functional prediction results. Bold numbers are significant (< 0.05)

| Comparison        | DNA Conservation  | DNA Repair        | Light energy      | Lithotrophy       | Nitrogen          |
|-------------------|-------------------|-------------------|-------------------|-------------------|-------------------|
| T[0] - T[1]       | <b>0.00489293</b> | <b>0.00293591</b> | 0.19388801        | <b>0.00030834</b> | <b>4.22E-17</b>   |
| T[0] - T[2]       | <b>0.02033475</b> | <b>0.0097339</b>  | 0.44831059        | <b>0.00749298</b> | <b>8.12E-12</b>   |
| T[0] - T[3]       | <b>0.02906312</b> | <b>0.01558465</b> | 0.2755365         | <b>0.01520981</b> | <b>8.15E-10</b>   |
| T[0] - T[R]       | <b>0.02863121</b> | <b>0.00520412</b> | 0.37990911        | <b>0.00162909</b> | <b>1.30E-12</b>   |
| T[1] - T[3]       | 0.21328302        | 0.24422913        | <b>0.04593218</b> | 0.072911          | <b>0.00403999</b> |
| T[1] - T[2]       | 0.26782432        | 0.31450078        | 0.19843215        | 0.12613918        | <b>0.03331074</b> |
| T[1] - T[R]       | 0.21549186        | 0.41187192        | 0.25970621        | 0.28894927        | 0.06264837        |
| T[2] - T[3]       | 0.43027457        | 0.41697806        | 0.20090041        | 0.37842665        | 0.20768207        |
| T[2] - T[R]       | 0.43325114        | 0.3972775         | 0.41957403        | 0.27813996        | 0.38159137        |
| T[3] - T[R]       | 0.49697916        | 0.31916653        | 0.14884666        | 0.184595          | 0.13225512        |
| <b>Chi-square</b> | 7.021623874       | 8.913054423       | 2.944440598       | 12.94456096       | 75.97487673       |

| Comparisons       | Organotrophy      | Phototrophy       | ROS             | Motility          | Sporulation       |
|-------------------|-------------------|-------------------|-----------------|-------------------|-------------------|
| T[0] - T[1]       | <b>0.00189691</b> | <b>5.38E-36</b>   | <b>5.70E-06</b> | <b>1.09E-18</b>   | <b>7.48E-05</b>   |
| T[0] - T[2]       | <b>0.02110913</b> | <b>8.46E-17</b>   | <b>2.77E-05</b> | <b>2.10E-14</b>   | <b>3.01E-09</b>   |
| T[0] - T[3]       | <b>0.04112206</b> | <b>8.77E-26</b>   | <b>8.96E-05</b> | <b>2.41E-11</b>   | <b>0.0008838</b>  |
| T[0] - T[R]       | <b>0.01948721</b> | <b>4.27E-35</b>   | <b>6.29E-05</b> | <b>1.22E-14</b>   | <b>0.00040669</b> |
| T[1] - T[3]       | 0.09077588        | <b>0.00930641</b> | 0.22920864      | <b>0.00608522</b> | 0.22132375        |
| T[1] - T[2]       | 0.15937532        | <b>5.23E-07</b>   | 0.33993514      | 0.08422197        | <b>0.00969216</b> |
| T[1] - T[R]       | 0.16882618        | 0.42394382        | 0.26107583      | 0.09739203        | 0.30432515        |
| T[2] - T[3]       | 0.3673185         | <b>0.00570786</b> | 0.37114762      | 0.12925022        | <b>0.00094887</b> |
| T[2] - T[R]       | 0.48475837        | <b>1.36E-06</b>   | 0.41005945      | 0.46785414        | <b>0.00218557</b> |
| T[3] - T[R]       | 0.35302059        | <b>0.01533294</b> | 0.45960721      | 0.11302291        | 0.39907998        |
| <b>Chi-square</b> | 8.60329063        | 195.4178784       | 22.91571278     | 87.21260295       | 34.5684137        |

560  
 561

562

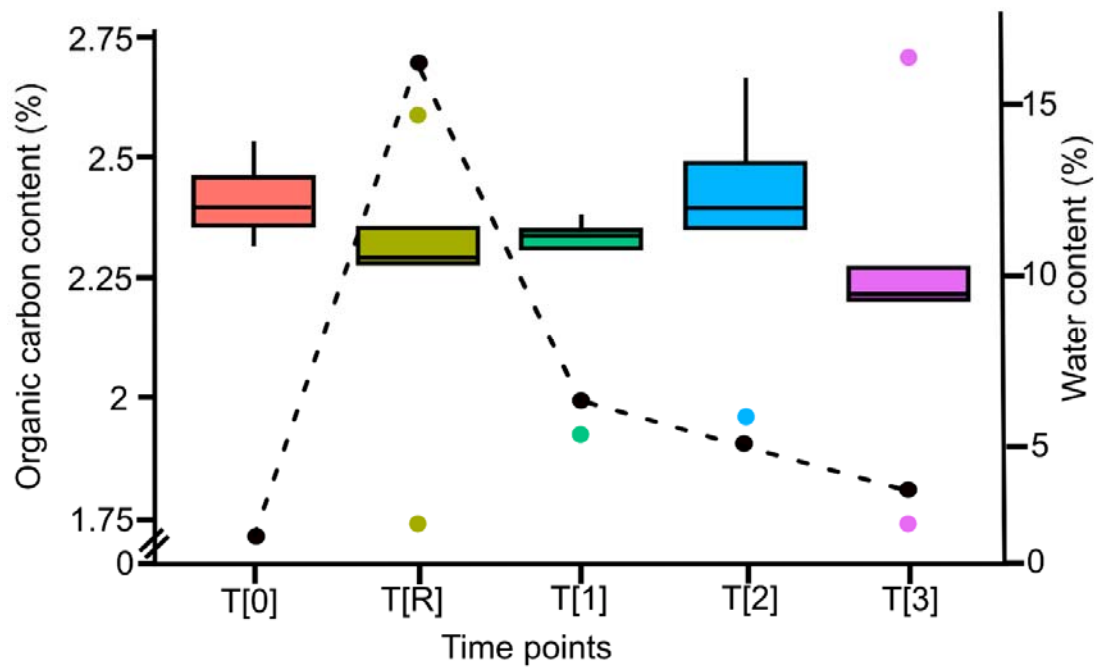

563  
564  
565  
566

Figure A.1. Barplot of the organic carbon content for each sampling point.

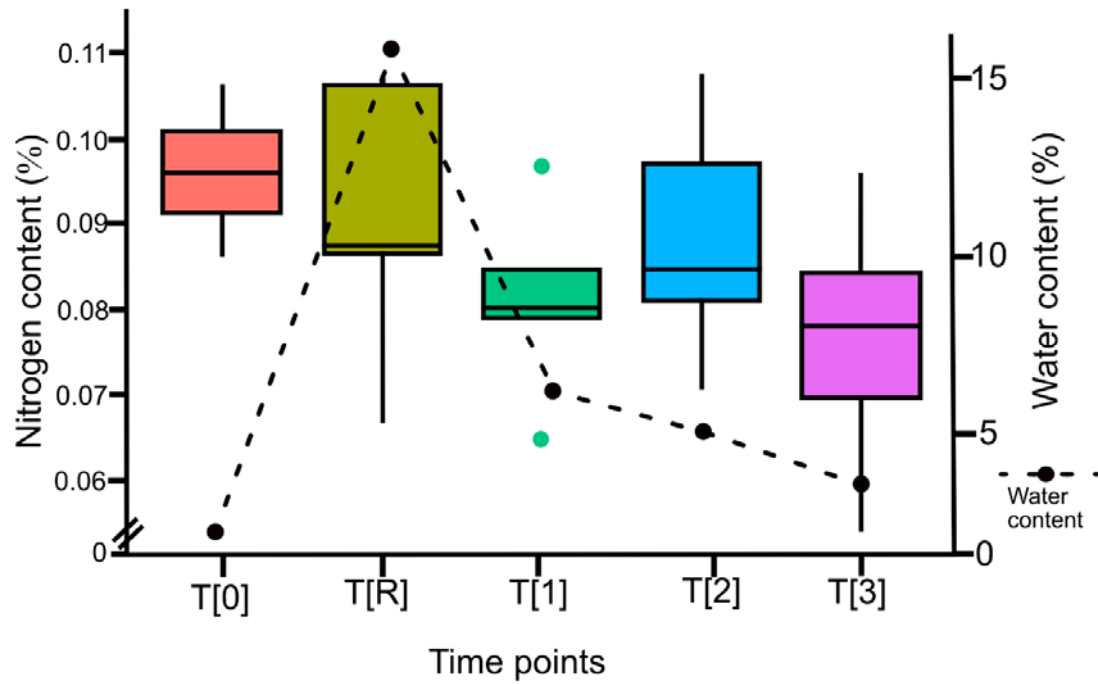

567

568 Figure A.2. Barplot of the nitrogen content (in g) for each time point.

569

570

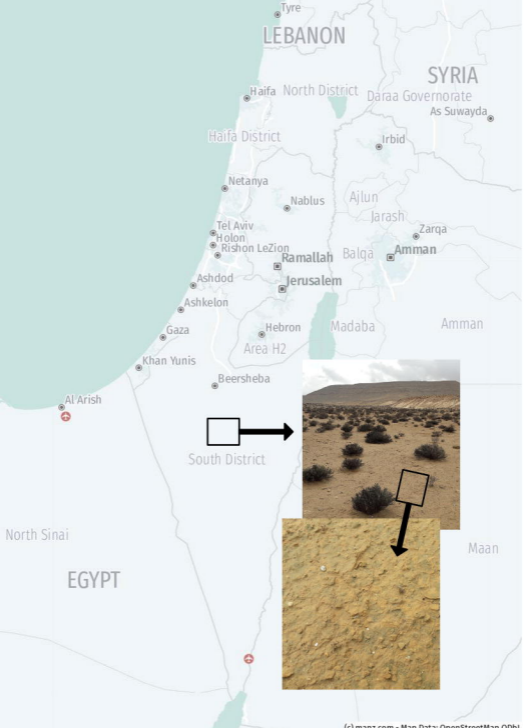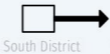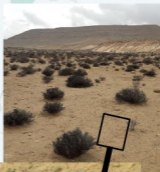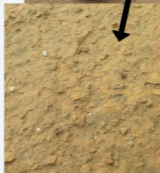



Chlorophyll content  
(mg chia / g soil)

Time points

- T[0]
- T[R]
- T[1]
- T[2]
- T[3]

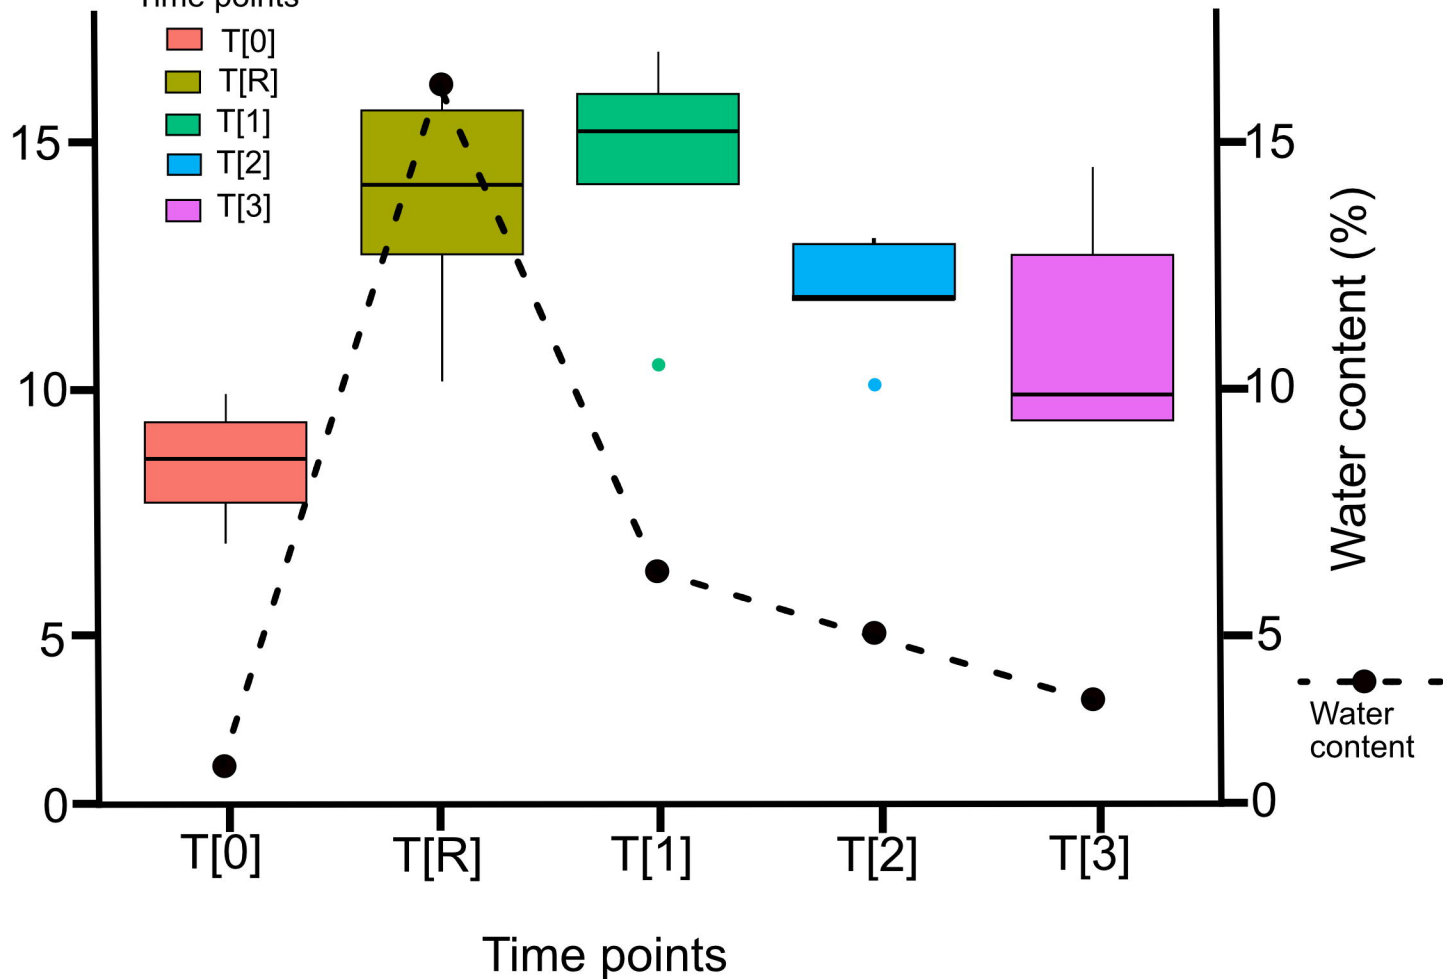

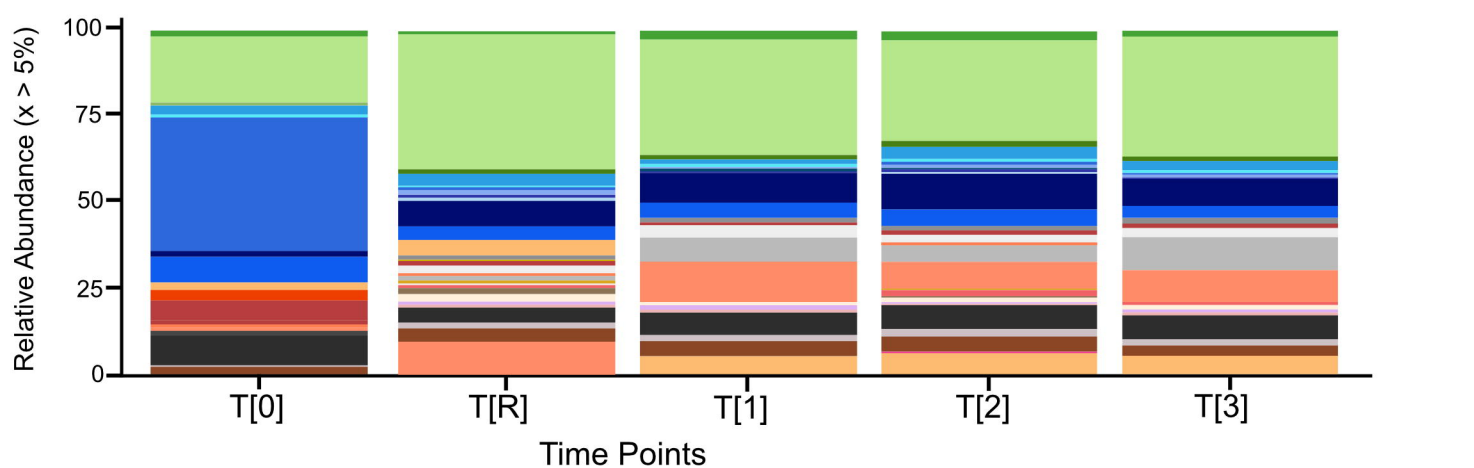

**Cyanobacterial orders**

- Chloroplast
- Cyanobacteriales
- Unknown Oxyhotobacteria
- Thermosynechococcale

**Actinobacterial orders**

- Frankiales
- IMCC26256
- Micrococcales
- Micromonosporales
- Microtrichales
- Propionibacteriales
- Pseudonocardiales
- Rubrobacteriales
- Solirubrobacteriales

**Other orders**

- Acetobacteriales
- Azospirillales
- Bryobacteriales
- Burkholderiales
- Caulobacteriales
- Chitinohagales
- Chthoniobacteriales
- Cytohagales
- Gemmatimonadales
- Haliangiales
- Kallotenuales
- Longimicrobiales
- Myxococcales
- Nannocystales
- Polyangiales
- Pseudomonadales
- Rhizobiales
- Rhodobacteriales
- Shingomonadales
- Thermomicrobiales
- Unclassified

Abundance (in CN)

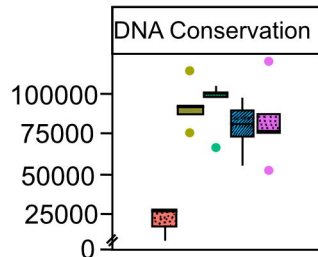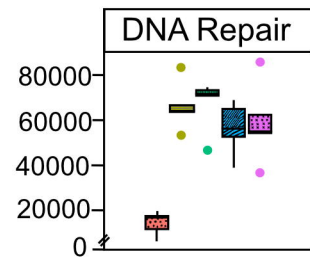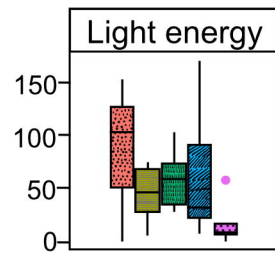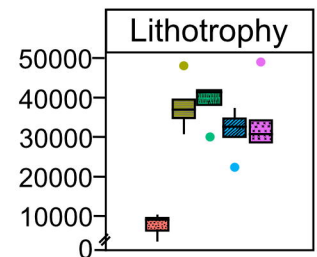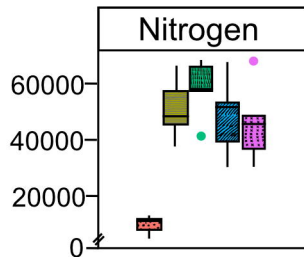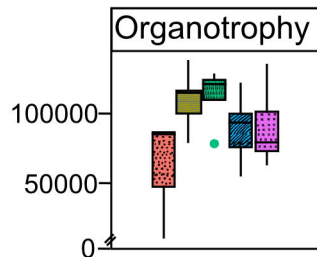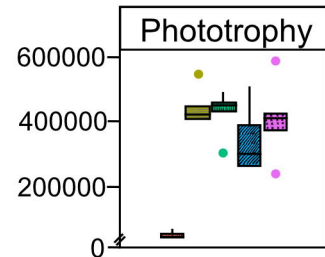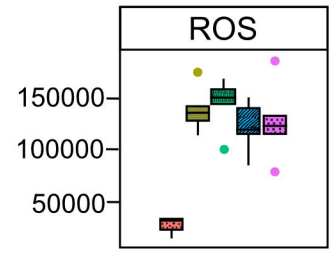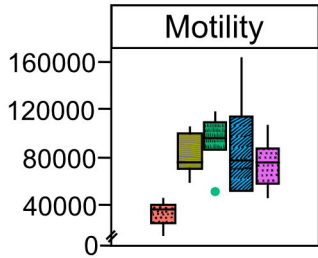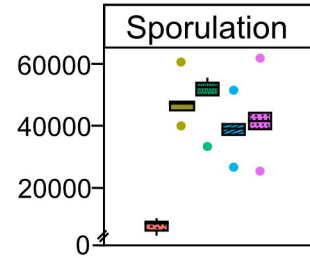

Time Points

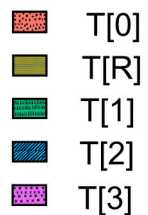

Source: https://www.biorxiv.org/content/10.1101/2021.04.04.438350v1.full.pdf
